1 *In vitro* and *In vivo* characterization of NOSO-502, a novel inhibitor of  
2 bacterial translation  
3

4 Emilie Racine,<sup>a</sup> Patrice Nordmann,<sup>b</sup> Lucile Pantel,<sup>a</sup> Matthieu Sarciaux,<sup>a</sup> Marine Serri,<sup>a</sup> Jessica  
5 Houard,<sup>a</sup> Philippe Villain-Guillot,<sup>a</sup> Anthony Demords,<sup>b</sup> Carina Vingsbo Lundberg,<sup>c</sup> and Maxime  
6 Gualtieri<sup>a†</sup>

7  
8 <sup>a</sup> Nosopharm, 110 allée Charles Babbage, Espace Innovation 2, Nîmes, France

9 <sup>b</sup> Emerging Antibiotic Resistance Unit, National Reference Center for Emerging Antibiotic  
10 Resistance, INSERM European Unit (LEA Paris, IAME, France), University of Fribourg,  
11 Switzerland

12 <sup>c</sup> Statens Serum Institut, Copenhagen, Denmark  
13

14 Running title: NOSO-502, novel inhibitor of bacterial translation  
15

16 † Corresponding author: [m.gualtieri@nosopharm.com](mailto:m.gualtieri@nosopharm.com)  
17

18 Keywords: Inhibitor, bacterial translation, carbapenem-resistant *Enterobacteriaceae*, preclinical  
19 candidate  
20

## 21 **ABSTRACT**

22 Antibacterial activity screening of a collection of *Xenorhabdus* strains led to the discovery of the  
23 Odilorhabdins, a novel antibiotic class with broad-spectrum activity against Gram-positive and  
24 Gram-negative pathogens. Odilorhabdins inhibit bacterial translation by a novel mechanism of  
25 action on ribosomes. A lead-optimization program identified NOSO-502 as a promising  
26 candidate. NOSO-502 has MIC values ranging from 0.5 to 4 µg/ml against standard  
27 *Enterobacteriaceae* strains and carbapenem-resistant *Enterobacteriaceae* (CRE) isolates that  
28 produce KPC, AmpC, or OXA enzymes and metallo-β-lactamases. In addition, this compound  
29 overcomes multiple chromosome-encoded or plasmid-mediated resistance mechanisms of  
30 acquired resistance to colistin. It is effective in mouse systemic infection models against *E. coli*  
31 EN122 (ESBL) or *E. coli* ATCC BAA-2469 (NDM-1), achieving an ED<sub>50</sub> of 3.5 mg/kg and 1-, 2- and  
32 3-log reductions in blood burden at 2.6, 3.8, and 5.9 mg/kg, respectively, in the first model and  
33 100% survival in the second, starting with a dose as low as 4 mg/kg. In a UTI model of *E. coli*  
34 UTI89, urine, bladder and kidney burdens were reduced by 2.39, 1.96, and 1.36 log<sub>10</sub> CFU/ml,  
35 respectively, after injecting 24 mg/kg. There was no cytotoxicity against HepG2, HK-2, or HRPT  
36 cells, no inhibition of hERG-CHO or Nav 1.5 -HEK current, and no increase of micronuclei at 512  
37 µM. NOSO-502, a compound with a novel mechanism of action, is active against  
38 *Enterobacteriaceae*, including all classes of CRE, has a low potential for resistance development,  
39 shows efficacy in several mouse models, and has a favorable *in vitro* safety profile.

40

41

42

43

## 44 INTRODUCTION

45 Antibiotic-resistant infections are spreading around the world. The urgent need to discover new  
46 families of antibacterial agents to counter the threat of drug-resistant infection is widely  
47 recognized. The U.S. Centers for Disease Control and Prevention (CDC) recently published a  
48 report outlining the top 18 drug-resistant threats. Two were classified as "urgent" in terms of  
49 threat level: carbapenem-resistant *Enterobacteriaceae* (CRE) and *Clostridium difficile* (1).  
50 Carbapenems are broad-spectrum  $\beta$ -lactam antibiotics saved for the treatment of the most  
51 serious infections. CRE have become resistant to all or nearly all antibiotics available and cause  
52 many types of serious infection, such as those of the respiratory tract, urinary tract, abdomen  
53 and bacteremia (2). The CDC estimates that 9,300 healthcare-associated infections are caused  
54 each year in the United States by the two most common types of CRE, carbapenem-resistant  
55 *Klebsiella* species and *Escherichia coli* species, causing approximately 600 deaths (1). In China,  
56 among the 664 CRE cases reported in 2015 in 25 hospitals, most were caused by *K. pneumoniae*  
57 (73.3%), *E. coli* (16.6%), or *E. cloacae* (7.1%) and the overall mortality rate was 33.5% (2).

58 Antibacterial activity screening of a collection of *Xenorhabdus* strains led to the discovery of the  
59 Odilorhabdins, a novel antibiotic class with broad-spectrum activity against Gram-positive and  
60 Gram-negative pathogens (3). Odilorhabdins inhibit bacterial translation by a novel mechanism  
61 of action on ribosomes (3). Their chemical tractability made them suitable for a lead optimization  
62 program by medicinal chemistry that led to the preclinical candidate NOSO-502 (Fig. 1).

63 We report the *in vitro* and *in vivo* characterization of NOSO-502. The data demonstrate that  
64 NOSO-502 is active against a panel of Gram-positive and Gram-negative bacteria, including  
65 carbapenem-resistant and polymyxin-resistant strains, and exhibits promising *in vivo* activity in

66 various murine infection models, a favorable *in vitro* safety profile, and a low potential for  
67 resistance development.

## 68 RESULTS

### 69 NOSO-502 exhibits potent antibacterial activity.

70 The antibacterial activity spectrum of NOSO-502 was assessed by testing a panel of Gram-  
71 positive and Gram-negative wild-type strains. The compound was active against Gram-negative  
72 pathogens of the *Enterobacteriaceae* family, such as *E. coli* or *K. pneumoniae*, with MIC values  
73 between 0.5 and 4 µg/ml, as well as *S. maltophilia*. In comparison, the MIC values of NOSO-502  
74 against *P. aeruginosa* and *A. baumannii* were > 64 µg/ml. For Gram-positive species, NOSO-502  
75 was more active against *Staphylococci* than *Enterococcus* or *Streptococcus* strains (**Table 1**).

76 The compound was also tested against a recent panel of *Enterobacteriaceae* clinical isolates.  
77 MIC<sub>90</sub> values were between 2 and 8 µg/ml against *E. coli*, *K. pneumoniae*, *Enterobacter cloacae*,  
78 and *Citrobacter freundii*. The antibacterial activity of NOSO-502 was conserved against  
79 fluoroquinolone-, aminoglycoside-, and polymyxin B-resistant strains of the panel (**Table 2**).

80 MIC values of NOSO-502 were determined against selected CRE and colistin-resistant isolates.  
81 The CRE strains tested produce KPC enzymes (Ambler class A carbapenemase-producing strains),  
82 metallo-β-lactamases, such as NDM, VIM, or IMP (Ambler class B carbapenemase-producing  
83 strains), AmpC (Ambler class C carbapenem-resistant strains), and OXA-48 enzymes (Ambler  
84 class D carbapenemase-producing strains). NOSO-502 exhibited potent activity against all  
85 carbapenemase-producing *Enterobacteriaceae* strains (**Table 3**) and overcame multiple  
86 mechanisms of colistin acquired resistance (chromosome-encoded mutations or deletions of  
87 *pmrA*, *pmrB*, *mgrB*, or *phoQ* genes or expression of *mcr-1*, *mcr-2*, or *mcr-3* genes), except  
88 mechanisms involving mutations of the *crrB* gene (**Table 4**).

89 NOSO-502 had rapid bactericidal activity against *E. coli* ATCC 25922 and *K. pneumoniae* ATCC  
90 43816, causing a 3-log decrease in CFU/ml at 1 h (4× and 8× MIC) (Fig. 2). We observed regrowth  
91 of *E. coli* at 4× MIC. Such regrowth at 24 h is not uncommon and has previously been reported  
92 for bactericidal antimicrobials, such as ciprofloxacin against *E. coli* (4).

93 The propensity of bacteria to develop resistance to NOSO-502 was assessed by determining the  
94 spontaneous frequency of resistance (FoR) to the compound with *E. coli* ATCC 25922 and *K.*  
95 *pneumoniae* ATCC 43816. Mutants of *E. coli* resistant to 4× MIC (16 µg/ml) or 8× MIC (32 µg/ml)  
96 of NOSO-502 were isolated at a frequency of  $3.0 \times 10^{-9}$  and  $<5.0 \times 10^{-10}$ , respectively. The  
97 frequency of resistance of *K. pneumoniae* was  $2.4 \times 10^{-9}$  at 4× MIC (4 µg/ml) and  $< 7 \times 10^{-10}$  at 8×  
98 MIC (8 µg/ml).

#### 99 **NOSO-502 has a good *in vitro* safety profile.**

100 The potential nephrotoxicity of NOSO-502 was assessed in cells derived directly from human  
101 kidney tissue, human renal proximal tubular epithelial cells (HRPTEpiC), and HK-2. A multiplexed  
102 assay with HRPTEpiC cells was used to assess cellular stress *in vitro* induced by NOSO-502. Three  
103 parameters were measured: a decrease in cell viability, the expression of heat shock protein 27  
104 (HSP27), and the level of kidney injury molecule-1 (KIM-1). A decrease in cell viability is a very  
105 sensitive marker to detect general toxicity but is not sufficient to predict nephrotoxicity, whereas  
106 increases in the level of biomarkers, such as KIM-1 or HSP27, are well correlated with dose levels  
107 of known nephrotoxic compounds (5, 6). HSP27 is expressed in response to cellular stress to  
108 block the apoptotic pathway. KIM-1 is a well-accepted marker of renal proximal tubule injury.  
109 NOSO-502 showed no cytotoxicity to HRPT cells and the molecule did not significantly increase  
110 (five-fold) KIM-1 or HSP27 levels at concentrations up to 100 µM. Polymyxin B and gentamicin,  
111 used as comparators in this study, showed different toxicity profiles. Polymyxin B was cytotoxic

112 at low concentrations ( $IC_{50} = 11.8 \mu\text{M}$ ) and induced a significant increase of KIM-1 and HSP27  
113 levels at 12.1 and 9.7  $\mu\text{M}$ , respectively. Gentamicin was not cytotoxic and did not increase KIM-  
114 1 levels at concentrations up to 100  $\mu\text{M}$  but induced a five-fold increase of HSP27 levels at 22.4  
115  $\mu\text{M}$ . NOSO-502 did not show any effect on HK-2 cell viability at concentrations up to 512  $\mu\text{M}$  (0%  
116 inhibition from 16 to 256  $\mu\text{M}$  and 9.4% inhibition at 512  $\mu\text{M}$ ).

117 The cardiotoxic effect of NOSO-502 was evaluated using the automated patch clamp human  
118 ether-a-go-go related gene (hERG) potassium channel assay. This test is now accepted as an early  
119 predictor of potential cardiotoxicity and is used routinely at an early stage in the drug discovery  
120 process. NOSO-502 did not significantly inhibit hERG currents at concentrations up to 512  $\mu\text{M}$   
121 (2.6% inhibition at 256  $\mu\text{M}$  and 1.9% inhibition at 512  $\mu\text{M}$ ). We also measured the effect of the  
122 compound on the voltage-gated cardiac sodium ion channel Nav 1.5. This channel is a key  
123 component for the initiation and transmission of the electrical signal throughout the heart. The  
124  $IC_{50}$  of NOSO-502 in the patch clamp Nav 1.5 sodium channel assay was higher than 512  $\mu\text{M}$ .

125 The genotoxic potential of NOSO-502 was investigated using the micronucleus (MN) assay. This  
126 test detects both aneugenic (whole chromosome) and clastogenic (chromosome breakage)  
127 damage in interphase cells (7). There was no significant increase of micronuclei in cells treated  
128 with 512  $\mu\text{M}$  of NOSO-502 *versus* an S9 medium negative control (0.61% cells with micronuclei  
129 for NOSO-502 *versus* 0.7% for S9 medium).

130 NOSO-502 had no cytotoxic effect against mammalian HepG2 (Human hepatocellular carcinoma)  
131 cells at concentrations up to 512  $\mu\text{M}$  (0% inhibition from 16 to 256  $\mu\text{M}$  and 4.2% inhibition at  
132 512  $\mu\text{M}$ ) and did not show any hemolytic activity at 100  $\mu\text{M}$ . The compound (10  $\mu\text{M}$ ) had no  
133 significant activity against any of the 55 cell surface receptors or enzymes tested in a broad-  
134 based screen.

135 **NOSO-502 is resistant to biotransformation by hepatocytes and microsomes.**

136 NOSO-502 was resistant to biotransformation when incubated in mouse, rat, dog, monkey, and  
137 human liver microsomes and hepatocytes during the *in vitro* study conducted to evaluate  
138 metabolic stability. After 45 minutes, 70.5 to 78.6% of NOSO-502 remained after incubation with  
139 microsomes of the different species. The half-lives of NOSO-502 in liver microsomes were 116,  
140 129, 101, 147, and 145 min for mouse, rat, dog, monkey, and human, respectively. After 60  
141 minutes, 79.5 to 91.9% of NOSO-502 remained after incubation with hepatocytes of the different  
142 species. The half-lives of NOSO-502 in hepatocytes were 192, 194, 483, 698, and 329 min for  
143 mouse, rat, dog, monkey, and human microsomes respectively.

144 **NOSO-502 shows variable stability in plasma of different species.**

145 NOSO-502 showed variable stability to biotransformation when incubated in mouse, rat, dog,  
146 monkey, and human plasma; 10.1 to 61.2% of NOSO-502 remained after incubation with plasma  
147 of the different species over the 120-min test period. The half-lives of NOSO-502 were 54, 36,  
148 158, 96, and 79 min for mouse, rat, dog, monkey, and human plasma, respectively.

149 **Pharmacokinetics.**

150 The pharmacokinetics of NOSO-502 was evaluated in normal female CD-1 mice or normal female  
151 Sprague-Dawley rats. NOSO-502 was administered intravenously at 30 mg/kg to mice and 15  
152 mg/kg to rats. The concentration-*versus*-time curves and the results of the pharmacokinetic  
153 analysis are summarized in **Figure 3**. In mice, NOSO-502 displayed moderate clearance (1.13  
154 L/h/kg), a moderate volume of distribution (0.66 L/kg), and a half-life of 25 min. The  
155 pharmacokinetics of NOSO-502 in rats showed a longer half-life (90 min) but were consistent  
156 with the results in mice, with a plasma clearance of 1.92 L/h/kg and a volume of distribution of  
157 0.94 L/kg. NOSO-502 showed moderate plasma protein binding, with 19.8, 20.5, 17.6, and 18.7%  
158 unbound in mouse, rat, dog, and human plasma, respectively.

159 **NOSO-502 shows efficacy in several murine infection models.**

160 The efficacy of NOSO-502 was evaluated in murine infection models to determine whether  
161 NOSO-502 has potential as a clinical therapy. *In vivo* efficacy studies were conducted by  
162 administering NOSO-502 subcutaneously. The efficacy of NOSO-502 was first assessed in a  
163 neutropenic murine sepsis infection model. This model, with *E. coli* EN122 (ESBL, clinical isolate),  
164 was established in female NMRI mice. NOSO-502 was administered subcutaneously 1 h post-  
165 inoculation at set concentrations of 1.3, 2.5, 5, 10, 20, and 40 mg/kg, whereas colistin was  
166 administered by the same route at 5 mg/kg. Five hours post-challenge, blood samples were  
167 collected, and the mice euthanized. Blood was serially plated and colonies enumerated to  
168 determine the CFU/ml of blood. NOSO-502 was highly effective, achieving an ED<sub>50</sub> of 3.5 mg/kg  
169 and 1-, 2- and 3-log reductions in blood burden at 2.6, 3.8, and 5.9 mg/kg, respectively (**Fig. 4**).

170 A mouse *E. coli* UTI89 upper urinary tract infection model was established in female C3H/HeN  
171 mice. Administration of 24 mg/kg NOSO-502 once daily resulted in a statistically significant  
172 reduction in urine, bladder, and kidney burdens relative to vehicle control animals. At four days  
173 post-infection, NOSO-502 reduced the urine burden by 2.39 log<sub>10</sub> CFU/ml ( $P \leq 0.0001$ ), the  
174 bladder burden by 1.96 log<sub>10</sub> CFU/ml ( $P = 0.0012$ ), and the kidney burden by 1.36 log<sub>10</sub> CFU/ml  
175 ( $P = 0.0123$ ) relative to vehicle (**Fig.5**).

176 A neutropenic mouse *E. coli* ATCC BAA-2469 (NDM-1) intraperitoneal (IP) sepsis infection model  
177 was established in male CD-1/ICR mice. Ninety percent of the vehicle-treated mice succumbed  
178 to infection prior to the end of the study. All NOSO-502-treated mice (4, 12, and 24 mg/kg)  
179 survived up to the end of the study at 24 h ( $P = 0.0009$  relative to vehicle). The vehicle group had  
180 a mean and median survival time of 19.8 h and 20.2 h, respectively. One subcutaneous  
181 administration of NOSO-502 resulted in statistically significant dose-dependent reductions in  
182 blood and IP wash burdens relative to vehicle control animals at all doses. Treatment with 4



183 mg/kg of NOSO-502 reduced the blood and IP wash burden by 1.48 log<sub>10</sub> CFU/ml (P = 0.0081)  
184 and 0.68 log<sub>10</sub> CFU/ml (P = 0.0145), respectively. Treatment with 12 mg/kg reduced the blood  
185 burden by 2.14 log<sub>10</sub> CFU/ml (P < 0.0001) and the IP wash burden by 2.07 log<sub>10</sub> CFU/ml (P ≤  
186 0.0001) and treatment with 24 mg/kg reduced the blood burden by 2.37 log<sub>10</sub> CFU/ml (P ≤  
187 0.0001) and the IP wash burden by 2.74 log<sub>10</sub> CFU/ml (P ≤ 0.0001) (Fig. 6).

188 A neutropenic mouse *K. pneumoniae* NCTC 13442 (OXA-48) lung infection model was established  
189 in male CD-1/ICR mice. NOSO-502 was administered subcutaneously 2 h, 8 h, 14 h and 20 h post-  
190 inoculation at set concentrations of 2, 6, and 20 mg/kg (equivalent to 8, 24 and 80 mg/kg/day),  
191 whereas tigecycline was administered by the same route at 40 mg/kg (equivalent to 160  
192 mg/kg/day). NOSO-502 was also administered once 2 h post-inoculation at 80 mg/kg. Twenty-  
193 six hours post-challenge, mice were euthanized, and the lungs collected. Administration of  
194 NOSO-502 resulted in statistically significant reductions in lung burdens relative to vehicle  
195 control animals at all doses. Treatment with 8, 24 and 80 mg/kg/day of NOSO-502 reduced the  
196 lung burden by 2.69, 3.99 and 4.07 log<sub>10</sub> CFU/gram of lung tissue respectively (P ≤ 0.0001).  
197 Treatment with 80 mg/kg once reduced the lung burden by 3.98 log<sub>10</sub> CFU/ gram of lung tissue  
198 (P ≤ 0.0001) and treatment with 160 mg/kg/day of tigecycline reduced the lung burden by 3.14  
199 log<sub>10</sub> CFU/ gram of lung tissue (P ≤ 0.0001) (Fig. 7).

## 200 DISCUSSION

201 The urgent need to discover new antibiotics active against Gram-negative bacteria with a novel  
202 mechanism of action to counter the threat of drug-resistant infection is widely recognized.  
203 NOSO-502 is the first preclinical candidate of a novel antibiotic class, the Odilorhabdins (ODLs).  
204 ODLs are cationic peptides that inhibit bacterial translation by a novel mechanism of action.  
205 ODLs bind to the small subunit of bacterial ribosomes at a site not exploited by any known

206 ribosome-targeting antibiotic. When bound to the ribosome, ODLs make contacts with both the  
207 rRNA and tRNA and kill bacteria by interfering with the decoding of genetic information and  
208 inhibiting ribosome progression along the mRNA in a context-specific manner **(3)**.

209 NOSO-502 is active against *Enterobacteriaceae*, including CRE belonging to all classes of the  
210 Ambler classification and resistant to gentamicin, polymyxin B, or tigecycline. This is crucial,  
211 because these antibiotics, classically used for the treatment of such infections, are associated  
212 with high levels of resistance ranging from 9.7 to 51.3% (mean 22.6%) for colistin, 5.6 to 85.4%  
213 (mean 43.5%) for gentamicin, and 0 to 33% (mean 15.2%) for tigecycline**(8, 9, 10, 11, 12, 13, 14,**  
214 **15, 16, 17)**. Current options to address these resistance issues are not entirely satisfactory,  
215 because none of the recently approved antibiotics or those under development are effective  
216 against all CRE. The combination Ceftazidime-avibactam displays *in vitro* activity against CRE  
217 isolates that produce KPC, AmpC and OXA enzymes. However, this drug is not active against  
218 metallo- $\beta$ -lactamases, such as NDM, IMP, or VIM **(18)**. This combination was approved by the  
219 US Food and Drug Administration in 2015 and by the European Medicines Agency in 2016 for  
220 treating complicated urinary tract and intra-abdominal infections. None of the novel  
221 antimicrobials (plazomicin, a new aminoglycoside or eravacycline, a new tetracycline) or novel  
222 combinations as aztreonam and avibactam, meropenem and vaborbactam, imipenem and  
223 relebactam/cilastatin, or ceftaroline fosamil and avibactam are effective against all classes of  
224 carbapenemases like NOSO-502 **(19)**. Recently, CRE have caused numerous outbreaks of severe  
225 nosocomial infections and have become endemic in several countries **(20, 21, 22, 23, 24)**. These  
226 infections have been associated with mortality rates exceeding 50% in some reports **(25, 26, 27,**  
227 **28)**. NOSO-502 can overcome multiple mechanisms of colistin-resistance strains. Furthermore,  
228 the compound demonstrated rapid bactericidal activity and a low potential for the development  
229 of resistance.

230 NOSO-502 is effective in mouse models of serious hospital-acquired infections. It provided  
231 significant protection against the Gram-negative pathogens *E. coli* and *K. pneumoniae*, the  
232 highest-incidence pathogens in complicated intra-abdominal and urinary tract infections, in  
233 septicemia following peritoneal challenge, and in acute pyelonephritis. NOSO-502 was active in  
234 mouse infection models against *E. coli* strains expressing the metallo- $\beta$ -lactamase NDM-1 and  
235 resistant to other major antibiotic classes, including fluoroquinolones, macrolides,  
236 aminoglycosides,  $\beta$ -lactams, cephalosporins, and carbapenems. These results are encouraging  
237 and show the strong potential for *in vivo* efficacy of NOSO-502. Effective doses will be optimized  
238 after the best dosing schedule is defined during a PKPD study.

239 NOSO-502 showed a good safety profile, with no *in vitro* nephrotoxicity, cardiotoxicity,  
240 genotoxicity, or cytotoxicity at concentrations up to 512  $\mu$ M. Nephrotoxicity is a serious side  
241 effect of many drugs, including cationic antibiotics aminoglycosides and polymyxins (29, 30, 31).  
242 Polymyxins accumulate extensively within proximal tubular cells (PTCs) of the kidneys, where  
243 they induce damage, which may lead to acute kidney injury (AKI) in patients (32). AKI is the major  
244 dose-limiting adverse effect of this class of antibiotics and affects 50 to 60% of patients receiving  
245 them (31, 33). Aminoglycosides are filtered across the glomerulus and then excreted, with 5 to  
246 10% of a parenteral dose being taken up and sequestered by the PTCs, in which the  
247 aminoglycoside can achieve high concentrations (34). AKI due to acute tubular necrosis is a  
248 relatively common complication of aminoglycoside therapy and affects 10 to 20% of patients  
249 (29, 30). The results of NOSO-502 on HRPTEpiC and HK-2 cells are promising, but must be  
250 confirmed by histopathological examination of kidney cells following *in vivo* administration to  
251 animals, the standard assay for studying nephrotoxicity effects.

252 Cardiotoxicity issues are associated with many antibiotics, including macrolides, ketolides, and  
253 fluoroquinolones. These classes have been associated with prolongation of cardiac

254 repolarization. All these agents produce a blockage of the hERG channel-dependent potassium  
255 current in myocyte membranes, resulting in a prolonged QTc interval which may give rise to  
256 ventricular fibrillation or tachycardia (35). Nav 1.5 is another channel involved in cardiotoxicity  
257 issues. Its activation induces depolarization of the cell membrane. Failure of the Nav 1.5 sodium  
258 channel to adequately conduct the electrical current across the cell membrane can result in a  
259 potentially fatal disorder. NOSO-502 did not show any effects on hERG or Nav 1.5 channels at  
260 high concentrations.

261 Here, we confirmed that NOSO-502, like many other therapeutic peptides, is safe and highly  
262 selective. NOSO-502 interacts strongly with a specific site on the 30S subunit of bacterial  
263 ribosomes but has no significant activity against any of the 55 cell surface receptors,  
264 transporters, or ion channels tested. There is increasing interest in peptides in pharmaceutical  
265 research and development (R&D) and approximately 140 are currently being evaluated in clinical  
266 trials and more than 500 are in preclinical development (36, 37). The main limitation of peptides  
267 is their predisposition to enzymatic degradation. Thus, most do not circulate in blood for more  
268 than a few minutes, preventing their usefulness as therapeutic agents. On the contrary, NOSO-  
269 502 showed good stability in plasma, microsomes, and hepatocytes, probably due to the  
270 presence in its structure of three non-standard amino-acid residues:  $\alpha,\gamma$ -diamino- $\beta$ -hydroxy  
271 butyric acid (Dab( $\beta$ OH)) at position 2 (*N*-terminus),  $\alpha,\beta$ -dehydro arginine (Dha) at position 9 (*C*-  
272 terminus), and D-ornithine at position 5. This translates into relatively long half-lives in mice and  
273 rats.

274 NOSO-502 represents a new class of very promising bacterial ribosomal inhibitors to combat  
275 bacterial multidrug resistance.

276

## 277 **MATERIALS AND METHODS**

278 **Bacterial strains and antimicrobial agents.** Reference strains are from the German collection of  
279 microorganism and cell cultures (DSM), the American Type Culture Collection (ATCC), the  
280 National Collection of Type Cultures (NCTC), and the Medical and Molecular Microbiology,  
281 Faculty of Science and Medicine, University of Fribourg, Switzerland. Clinical strains used to  
282 determine the MIC<sub>90</sub> of NOSO-502 come from Warsaw, Copenhagen, Cardiff, and Madrid  
283 hospitals. NOSO-502 was synthesized at Nosopharm, Nîmes, France. Ciprofloxacin (Sigma-  
284 Aldrich, ref: 1134335), gentamicin (Sigma-Aldrich, ref: G1397), imipenem (Sigma-Aldrich, ref  
285 IO160), polymyxin B (Sigma-Aldrich, ref: 92283), and tigecycline (Sigma-Aldrich, ref: PZ0021)  
286 were provided by the manufacturers as standard powders except for gentamicin and polymyxin  
287 B, in solution at 50 and 20 mg/ml respectively.

288 **Minimum inhibitory concentration (MIC).** MIC values were determined using Clinical and  
289 Laboratory Standards Institute (CLSI) broth microdilution methodology, colony direct  
290 suspension, as described in CLSI document M07-A10 (38).

291 **Time-dependent killing.** Time-kill assays were performed by the broth macrodilution method,  
292 according to the CLSI guidelines M26-A (39).

293 For preparing the inoculum, between 5 and 30 colonies of a single morphological type from a  
294 16- to 24-h Mueller–Hinton agar plate (MHA) were picked and used to inoculate a tube  
295 containing 5 ml prewarmed cation-adjusted Mueller–Hinton broth (CA-MHB). The bacterial  
296 suspension was incubated at 35°C until it was visibly turbid. The turbidity of the actively growing  
297 broth culture was adjusted with CA-MHB to obtain a calculated OD<sub>600</sub> between 0.11 and 0.15.  
298 Shaken flasks (250 ml) containing 50 ml CA-MHB, with the appropriate NOSO-502  
299 concentrations, were inoculated with 0.5 ml exponentially grown bacteria suspension ( $5 \times 10^7$

300 cells/ml) to yield a final concentration of approximately  $5 \times 10^5$  cells/ml. Two multiples of the  
301 MICs (four and eight) were used to detect differences in killing. Flasks were incubated at 35°C,  
302 with shaking at 150 rpm, and aliquots removed at 0, 1, 2, 3, 4, 6, and 24 h for the determination  
303 of viable counts. Serial dilutions were prepared in a sterile 0.9% sodium chloride solution and  
304 plated on MHA plates. The plates were incubated at 35°C for 24 h, and the number of colonies  
305 determined. The detection level by this plating method was 50 CFU/ml. Killing curves were  
306 constructed by plotting the  $\log_{10}$  CFU/ml *versus* time over 24 h and the change in bacterial  
307 concentration determined.

308 **Determination of mutation frequency.** Bacterial strains were grown in antibiotic-free Luria  
309 Bertani broth at 35°C for 18 h. Approximately  $10^9$  CFU of each strain were plated in duplicate  
310 onto MHA plates containing NOSO-502 concentrations at 4× and 8× the MIC values. The plates  
311 were read after 24 and 48 h of incubation at 35°C. The frequency of selected resistant mutants  
312 was calculated as the ratio of the number of bacteria growing divided by the number of bacteria  
313 in the original inoculum, which was calculated by plating several dilutions of the original  
314 inoculum.

315 **Multiplexed HRPTEpiC cytotoxicity assay.** The multiplexed cytotoxicity assay on human renal  
316 proximal tubule epithelial cells (HRPTEpiC) was conducted by Eurofins Panlabs (Eurofins Panlabs,  
317 Inc. St Charles, MO, USA) by using an image-based High Content Analysis (HCA) technique where  
318 cells were fixed and stained with nuclear dye to visualize nuclei and fluorescently labeled  
319 antibodies to detect drug induced cellular injury and cellular stress arising from oxidative and  
320 chemical stress. Cells were seeded into 384-well plates and grown in RPMI1640, 10% FBS, 2 mM  
321 L-alanyl-L-Glutamine, 1 mM Sodium Pyruvate in a humidified atmosphere of 5% CO<sub>2</sub> at 37°C.  
322 NOSO-502, gentamicin and polymyxin B were added 24 h post cell seeding. Compounds were  
323 serially diluted 3.16-fold and assayed over 10 concentrations in a final assay concentration of

324 0.5% DMSO from 100  $\mu$ M to 3.7 nM. At the same time, a time zero untreated cell plate was  
325 generated. After a 48-h incubation period, cells were fixed and stained with fluorescently labeled  
326 antibodies and nuclear dyed to allow visualization of nuclei, injured cells and stressed cells.  
327 Injured cells were detected using a KIM-1 (Kidney Injury Molecule-1) antibody. Stressed cells  
328 were detected using an anti-HSP27 (Heat Shock Protein 27) antibody. Cell proliferation was  
329 measured by the signal intensity of the incorporated nuclear dye. The cell proliferation assay  
330 output was referred to as the relative cell count. To determine the cell proliferation end point,  
331 the cell proliferation data output was transformed to percent of control (POC) using the  
332 following formula:  $POC = \text{relative cell count (compound wells)} / \text{relative cell count (vehicle wells)}$   
333  $\times 100$ . The signal intensity of the incorporated cellular stress and injury measurements were  
334 normalized with the relative cell count from each well. Automated fluorescence microscopy was  
335 carried out using a Molecular Devices ImageXpress Micro imager, and images were collected  
336 with a 4 $\times$  objective.

337 **Cytotoxicity testing.** HK-2 and HepG2 cytotoxicity assays were run by Eurofins-Cerep (Cerep  
338 Cytotoxicity Profile, Eurofins-Cerep SA, Poitiers, France) as described in reference (40). Cell  
339 viability was measured using a luciferase-coupled ATP-quantitation assay (CellTiter-Glo;  
340 Promega, Madison, WI, USA). In this assay, luminescent signal is proportional to the amount of  
341 ATP and thus to the number of metabolically competent cells; cell injury and death result in a  
342 marked decrease in intracellular ATP levels. HK-2 and HepG2 cells were dispensed at 6,000–  
343 3,000 cells/5  $\mu$ l/well in white tissue-culture treated 96-well solid-bottom assay plates and  
344 incubated at 37°C for 16 h, to allow cell attachment, followed by the addition of NOSO-502 at  
345 16, 32, 64, 128, 256, and 512  $\mu$ M. After compound addition, plates were incubated for 48 h at  
346 37°C. At the end of the incubation period, 5  $\mu$ l CellTiter-Glo reagent was added, the plates were  
347 incubated at room temperature for 30 min, and the luminescence intensity of each well was

348 determined. Each experiment was carried out in duplicate and the results are reported as the  
349 average percent of cytotoxicity for each test concentration and as IC<sub>50</sub> value (concentration  
350 producing a half-maximal inhibition of control response = half maximal cytotoxicity) determined  
351 by non-linear regression analysis of the concentration-response curve generated with mean  
352 replicate values using Hill equation curve fitting.

353 **hERG tail current inhibition.** Inhibition of the human ether-a-go-go-related gene (hERG) cardiac  
354 potassium ion channel was determined by Eurofins Panlabs (, St Charles, MO, USA) in CHO-K1  
355 (Chinese Hamster Ovary) cells stably transfected with human hERG cDNA using QPatch  
356 Automated whole-cell patch clamp electrophysiology as described in reference (41). NOSO-502  
357 was tested at 64, 256 and 512 µM, the extracellular solution (control) is applied first and the cell  
358 is stabilized in the solution for 5 min. Then the test compound is applied from low to high  
359 concentrations sequentially on the same cell with 5min each test concentration at room  
360 temperature.

361 **Nav 1.5 peak current inhibition.** Inhibition of the Nav 1.5 human sodium ion channel was  
362 determined by Eurofins Panlabs (, St Charles, MO, USA) in HEK-293 cells stably transfected with  
363 human Nav1.5 cDNA (type V voltage-gated sodium channel alpha subunit, accession  
364 #NM\_000335) using IonWorks Quattro Automated whole-cell patch clamp electrophysiology.  
365 NOSO-502 was tested at 4, 8, 16, 32, 64, 128, 256 and 512 µM, the voltage protocol is applied  
366 prior to compound addition (Pre), the compounds are added and incubated for 600 seconds at  
367 room temperature, and then the voltage protocol is applied a final time (Post) on the IonWorks  
368 Quattro.

369 ***In vitro* Micronucleus assay.** The test was conducted by Eurofins Panlabs (, St Charles, MO, USA).



370 CHO-K1 cells were pre-loaded with a cell dye that stains the cytoplasm, after which the cells  
371 were treated with NOSO-502 at 32, 64, 128, 256 and 512  $\mu\text{M}$  for 24 h. At the end of the  
372 incubation period the cells were fixed, and their DNA was stained with Hoechst. The visualization  
373 and scoring of the cells was done using an automated fluorescent microscope coupled with  
374 proprietary automated image analysis software (42). The percent of micronucleated cells is  
375 calculated. A marginally-positive result ("-/+") is defined as a value significantly higher than  
376 controls (t-test,  $p < 0.05$ ), and at least 2-fold higher than controls. A positive result ("+") is defined  
377 as a value significantly higher than controls (t-test,  $p < 0.05$ ) and at least 3-fold higher than  
378 controls.

379 **Hemolytic activity.** Mouse red blood cells were washed with Phosphate Buffered Saline (PBS)  
380 until the supernatant was clear after centrifugation and resuspended in PBS to 10% (v/v). Three  
381 hundred microliters of the suspension were added to a microtube containing an equal volume  
382 of NOSO-502 to give a final concentration of 100  $\mu\text{M}$ . PBS and deionized water were used as 0  
383 and 100% hemolytic controls, respectively. Plates were incubated at 35°C for 45 min.  
384 Subsequently, the microtube was centrifuged and the supernatant transferred to a new  
385 microtube. The release of hemoglobin in the supernatant was monitored by absorbance at 540  
386 nm. Experiments were performed in triplicates.

387 **Hepatocyte stability.** The hepatocyte metabolic stability assays were performed by Cyprotex  
388 discovery Ltd. (Macclesfield, UK). This assay utilizes cryopreserved pooled hepatocytes from  
389 different species (mouse, rat, dog, monkey and human), stored in liquid nitrogen prior to use.  
390 Williams E media supplemented with 2 mM L-glutamine, 25 mM HEPES and NOSO-502 (NOSO-  
391 502 final substrate concentration 1  $\mu\text{M}$ , test compound prepared in water; control compound  
392 final substrate concentration 3  $\mu\text{M}$ , final DMSO concentration 0.25%) were pre-incubated at  
393 37°C prior to the addition of a suspension of cryopreserved hepatocytes (final cell density  $0.5 \times$

394  $10^6$  viable cells/ml in Williams E media supplemented with 2 mM L-glutamine and 25 mM HEPES)  
395 to initiate the reaction. The final incubation volume was 500  $\mu$ l. Two control compounds were  
396 included with each species alongside an appropriate vehicle control. The reactions were stopped  
397 by transferring an aliquot of the mixture to 40% trichloroacetic acid (TCA) in water, containing  
398 internal standard for the test compounds (NOSO-95216, 1  $\mu$ M final concentration), or methanol  
399 for the control compounds, at various time points (0, 5, 10, 20, 40 and 60 min). The termination  
400 plates were centrifuged at 2,500 rpm at 4°C for 30 min to precipitate the protein. Following  
401 protein precipitation, the test compound sample supernatants were diluted with analytical  
402 grade water, whereas the control compounds were diluted with internal standard (metoprolol)  
403 in water. The test compound samples were analyzed by LC-MS/MS. The gradient of the line was  
404 determined from a plot of  $\ln$  peak area ratios (compound peak area/internal standard peak area)  
405 against time. Subsequently, half-life and intrinsic clearance were calculated using the following  
406 equations: elimination rate constant ( $k$ ) = (- gradient); half-life ( $t_{1/2}$ ) (min) =  $0.693/k$ ; intrinsic  
407 clearance ( $CL_{int}$ ) ( $\mu$ l/min/million cells) =  $(V \times 0.693)/t_{1/2}$  where  $V$  = incubation volume ( $\mu$ l)/  
408 Number of cells. Relevant control compounds were assessed, ensuring that intrinsic clearance  
409 values fell within the specified limits (if available).

410 **Microsome stability.** The microsome metabolic stability assays were performed by Cyprotex  
411 discovery Ltd. (Macclesfield, UK). Pooled microsomes from different species (mouse, rat, dog,  
412 monkey, and human) were stored at -80°C prior to use. Microsomes (final protein concentration  
413 0.5 mg/ml), 0.1 M phosphate buffer pH 7.4, and NOSO-502 (test compound final substrate  
414 concentration 1  $\mu$ M, test compound prepared in water; control compound final substrate  
415 concentration 3  $\mu$ M, final DMSO concentration 0.25%) were pre-incubated at 37°C prior to the  
416 addition of NADPH (final concentration 1 mM) to initiate the reaction. The final incubation  
417 volume was 500  $\mu$ l. A minus cofactor control incubation was included for each compound tested,

418 in which 0.1 M phosphate buffer pH 7.4 was added instead of NADPH (minus NADPH). Two  
419 control compounds were included with each species. Each compound was incubated for 0, 5, 15,  
420 30 and 45 min. The control (minus NADPH) was incubated for 45 min only. The reactions were  
421 stopped by transferring an aliquot of the mixture to 40% TCA in water containing internal  
422 standard (NOSO-95216, 1  $\mu$ M final concentration) for the test compounds, or methanol for the  
423 control compounds, at the indicated time points. The termination plates were centrifuged at  
424 2,500 rpm for 20 min at 4°C to precipitate the protein. Following protein precipitation, the test  
425 compound sample supernatants were diluted with analytical grade water, whereas the control  
426 compounds were diluted with internal standard (metoprolol) in water. The test compound  
427 samples were analyzed by LC-MS/MS. The gradient of the line was determined from a plot of ln  
428 peak area ratios (compound peak area/internal standard peak area) against time. Subsequently,  
429 the half-life and intrinsic clearance were calculated using the following equations: elimination  
430 rate constant ( $k$ ) = (- gradient); half-life ( $t_{1/2}$ ) (min) = 0.693/ $k$ ; intrinsic clearance ( $CL_{int}$ )  
431 ( $\mu$ l/min/mg protein) = ( $V \times 0.693$ )/ $t_{1/2}$  where  $V$  = incubation volume ( $\mu$ l)/microsomal protein (mg).  
432 Relevant control compounds were assessed, ensuring that intrinsic clearance values fell within  
433 the specified limits (if available).

434 **Plasma stability.** The plasma stability assays were performed by Cyprotex Discovery Ltd.  
435 (Macclesfield, UK). Species-specific plasma (heparin anti-coagulant) was adjusted to pH 7.4 at  
436 37°C and NOSO-502 or control compound (test compound final substrate concentration 10  $\mu$ M,  
437 test compound prepared in water; control compound final substrate concentration 1  $\mu$ M, final  
438 DMSO concentration 2.5%) was added to initiate the reaction. The final incubation volume was  
439 200  $\mu$ l. All incubations were performed singularly for each compound at each time point. A  
440 vehicle control incubation was included using either water or DMSO, along with a control  
441 compound known to be metabolized specifically by each species. Each compound was incubated

442 for 0, 15, 30, 60, and 120 min at 37°C. The reactions were stopped by the addition of 40% TCA  
443 in water containing internal standard (NOSO-95216, 1 µM final concentration) for the test  
444 compounds, or methanol for the control compounds, at the appropriate time points. The vehicle  
445 control incubation was incubated for 120 min only. The termination plates were centrifuged at  
446 3,000 rpm for 45 min at 4°C to precipitate the protein. Following protein precipitation, the test  
447 compound sample supernatants were diluted with analytical grade water, whereas the control  
448 compounds were diluted with internal standard (metoprolol) in water. The test compound  
449 samples were analyzed by LC-MS/MS. The percentage of parent compound remaining at each  
450 time point relative to the 0 min sample was calculated from peak area ratios (compound peak  
451 area/internal standard peak area).

452 **Selectivity profile.** The affinity of NOSO-502 tested at 10 µM was assessed using radioligand  
453 binding assays for 55 cell surface receptors, transporters, and ion channels were tested by  
454 Eurofins-Cerep (Cerep Diversity Profile, Eurofins-Cerep SA, Poitiers, France). Receptors tested  
455 included those to adenosine (A<sub>1</sub>, A<sub>2A</sub>, A<sub>3</sub>), adrenergic (alpha<sub>1</sub>, alpha<sub>2</sub>, beta<sub>1</sub>, beta<sub>2</sub>), angiotensin-  
456 II (AT<sub>1</sub>), bradykinin (B<sub>2</sub>), cannabinoid (CB<sub>1</sub>), chemokines (CCCR<sub>1</sub>, CXCR<sub>2</sub>) cholecystokinin (CCK<sub>1</sub>),  
457 dopamine (D<sub>1</sub>, D<sub>2S</sub>), endothelin (ET<sub>a</sub>), GABA non-selective, galanine, (GAL<sub>2</sub>), histamine (H<sub>1</sub>, H<sub>2</sub>),  
458 melanocortin (MC<sub>4</sub>), muscarinic (M<sub>1</sub>, M<sub>2</sub>, M<sub>3</sub>), neurokinin (NK<sub>2</sub>, NK<sub>3</sub>), neuropeptide Y (Y<sub>1</sub>, Y<sub>2</sub>),  
459 neurotensin (NTS<sub>1</sub>), opioid and opioid-like (delta<sub>2</sub>, kappa, mu, NOP), prostanoid (EP<sub>4</sub>), serotonin  
460 (5-HT<sub>1A</sub>, 5-HT<sub>1B</sub>, 5-HT<sub>2A</sub>, 5-HT<sub>2B</sub>, 5-HT<sub>5A</sub>, 5-HT<sub>6</sub>, 5-HT<sub>7</sub>), somatostatin (sst), vasoactive intestinal  
461 peptide (VPAC<sub>1</sub>), and vasopressin (V<sub>1a</sub>). Transporters tested included the dopamine transporter  
462 (DAT), norepinephrine transporter (NET), and serotonin transporter (5-HT). Ion channels tested  
463 included those for potassium (K<sub>v</sub> and SK<sub>Ca</sub> channels) calcium (Ca<sup>2+</sup> channel, L-type, verapamil  
464 site), sodium (Na<sup>+</sup> channel site 2), GABA (BZD and Cl<sup>-</sup> channel GABA gated), and serotonin (5-  
465 HT<sub>3</sub>). Receptor, transporter, or ion channel binding by a specific ligand was defined as the

466 difference between total and nonspecific binding, determined in the presence of an excess of  
467 unlabelled ligand. Results are expressed as the percent inhibition of control-specific binding or  
468 the percent variation of control values obtained in the presence of NOSO-502.

469 **Pharmacokinetic analysis.** Pharmacokinetics were performed by Pharmacelsus (Saarbrücken,  
470 Germany). CD-1 female mice and female Sprague Dawley rats were injected intravenously with  
471 30 and 15 mg/kg of NOSO-502, respectively, prepared in saline (5 ml/kg). Blood (100 µl) was  
472 collected from three animals per time point (5, 10, 20, 30, 60 and 120 min post-dose for mice  
473 and 5, 15, 30, 60, 180 and 420 min post-dose for rats) in tubes containing K3-EDTA as  
474 anticoagulant. Samples were stored on ice and centrifuged at 6,000 rpm for 10 min at 4°C. A  
475 sample volume of 50 µl was mixed with 5 µl solvent (acetonitrile/H<sub>2</sub>O/DMSO, (5/4/1, v/v/v) +  
476 1% formic acid). A volume of 10 µl solvent containing the internal standard and 50 µl precipitant  
477 (10% TCA) were added to 55 µl of sample. The mixture was vortexed and centrifuged at 6,000 x  
478 g (room temperature) for 10 min. The protein-free supernatant was analysed by LC-MS using an  
479 Ultimate 3000RS U-HPLC coupled with an Orbitrap Q Exactive mass spectrometer.

480 Analytes were separated on a Accurore phenyl-hexyl analytical column (2.1 X 50 mm, 2.6 µM,  
481 Thermo, Germany) using a linear gradient of mobile phase A (acetonitrile/0.2%  
482 heptafluorobutyric acid)-mobile phase B (water/0.2% heptafluorobutyric acid), starting from 5%  
483 of mobile phase A to 97% in 2.2 min, and a flow rate of 0.6 µl/min. Peaks were analysed by mass  
484 spectrometry (ESI ionization in MRM mode) using Xcalibur 4.0 software. The products [M+2H]<sup>2+</sup>  
485 and [M+3H]<sup>3+</sup> analysed were 539.8 and 360.2 Da, respectively. PK parameters were calculated  
486 using a non-compartmental analysis model and Kinetica 5.0 software (Thermo Scientific,  
487 Waltham, USA). The mean plasma concentrations from all three mice at each time point were  
488 used in the calculation.

489 **Plasma protein binding.** The plasma stability assays were performed by Cyprotex Discovery Ltd.  
490 (Macclesfield, UK). This study was conducted to determine the extent of binding of NOSO-502  
491 to the proteins in human, monkey, dog, rat and mouse plasma. Solutions of NOSO-502 or control  
492 compound (NOSO-502 final substrate concentration 2  $\mu$ M in water; control compound final  
493 substrate concentration 2  $\mu$ M, final DMSO concentration 0.5 %) were prepared in 100% species-  
494 specific plasma (collected using EDTA as the anti-coagulant). The experiment was performed  
495 using equilibrium dialysis (RED device) with the two compartments separated by a semi-  
496 permeable membrane. Buffer (pH 7.4) was added to one side of the membrane and the plasma  
497 solution to the other. After equilibration (4 h), samples were taken from both sides of the  
498 membrane. Calibration standards were prepared in plasma and buffer. All incubations were  
499 performed in triplicate. A control compound was included in each experiment. Incubation of the  
500 control compound samples was terminated with acetonitrile containing internal standard  
501 (metoprolol). Incubation of the test compound samples was terminated with 40% TCA in water  
502 containing internal standard (NOSO-95216, 1  $\mu$ M final concentration). All samples were  
503 centrifuged and further diluted with water prior to analysis. The solutions for each batch of  
504 control compounds were combined into two groups (protein-free and protein-containing) and  
505 cassette analysed by LC-MS/MS using two sets of calibration standards for protein-free (seven  
506 points) and protein-containing solutions (seven points).

507 **Mouse neutropenic peritonitis/sepsis model.** NOSO-502 was tested against *E. coli* EN122 (MIC  
508 = 4  $\mu$ g/ml, ESBL, clinical isolate 106-EC-09, Denmark) in a murine neutropenic peritonitis/sepsis  
509 model. Female NMRI mice (Taconic Biosciences A/S, Lille Skensved, Denmark) were used. Mice  
510 had *ad libitum* access to domestic quality drinking water and food (2016 16% Protein Rodents  
511 Diet, Harlan, USA) and were exposed to a 12-h light/dark cycle. All animal experiments were  
512 approved by the National Committee of Animal Ethics, Denmark, and adhered to the standards

513 of EU Directive 2010/63/EU. Mice were allowed to acclimatize for four days and thereafter  
514 neutropenia was induced by intraperitoneal injections of cyclophosphamide (Baxter A/S Søborg  
515 Denmark) four days (200 mg/kg) and one day (100 mg/kg) prior to inoculation. Overnight *E. coli*  
516 colonies were suspended in saline to  $10^7$  CFU/ml and mice were inoculated intraperitoneally  
517 with 0.5 ml of the suspension. At 1 h post-inoculation, mice were treated with 1.3, 2.5, 4, 10, 20,  
518 or 40 mg/kg NOSO-502, vehicle (PBS pH 7.4) or 5 mg/kg colistin (Sigma-Aldrich, ref: 4461),  
519 subcutaneously as a single dose in 0.2 ml. Four hours after treatment, mice were anesthetized,  
520 and blood was collected by axillary cutdown. Blood samples were serially diluted and plated on  
521 blood agar plates (SSI Diagnostica, Hillerød, Denmark) with subsequent counting of colonies  
522 after incubation overnight at 35°C in ambient air. The mice were observed during the study for  
523 clinical signs of infection, such as lack of curiosity, social withdrawal, changes in body position  
524 and patterns of movement, distress, or pain.

525 **Mouse UTI model.** *Ethics statement:* All animal studies were performed under UK Home Office  
526 License P2BC7D240 with local ethical committee clearance. All studies were performed by  
527 technicians who completed parts A, B, and C of the UK Home Office Personal License course and  
528 hold current personal licenses. All experiments were performed in dedicated Biohazard 2  
529 facilities (this site holds a Certificate of Designation).

530 NOSO-502 was tested against *E. coli* UTI89 (MIC= 4 µg/ml) in a mouse urinary tract infection  
531 (UTI) model by Evotec (Manchester, UK). Female C3H/HeN mice 18-22g (Janvier laboratories,  
532 UK) were allowed to acclimatize for seven days. Following acclimatization, drinking water was  
533 replaced by water containing 5% glucose from five days pre-infection. Previously prepared  
534 frozen stocks of *E. coli* UTI89 were diluted to  $1 \times 10^{10}$  CFU/ml immediately prior to infection.  
535 Mice were infected by directly administering 0.05 ml inoculum ( $5 \times 10^8$  CFU/mouse) *via* the  
536 urethra into the bladder under parenteral anesthesia (90 mg/kg ketamine and 9 mg/kg xylazine).

537 Bladders were emptied prior to infection, and once infected, infection catheters were left in the  
538 urinary tract for 10 min to reduce the risk of the organism flowing back out. Following catheter  
539 removal mice were allowed to fully recover in warmed humidified cages. Dose formulations of  
540 NOSO-502 were prepared in 25 mM PBS. Treatment with 4, 12 and 24 mg/kg NOSO-502 was  
541 initiated 24 h post-infection and was administered once daily (q24h) by subcutaneous injection  
542 or intravenously (ciprofloxacin) for three days. Mice were euthanized 96 h post-infection (three  
543 doses administered). Ciprofloxacin (Bayer, Lot BXHEFTI), administered at 10 mg/kg/dose IV BID,  
544 was included as a comparator (six doses administered) and 25 mM PBS was used as vehicle.  
545 Urine was collected 24 h post-infection from all animals and used to assess the infection level of  
546 each mouse prior to initiation of treatment; all mice were successfully infected. In addition, five  
547 mice were euthanized by pentobarbitone overdose to provide a 24 h pretreatment control  
548 group. The clinical condition and body weight of all remaining animals were assessed and urine  
549 samples collected 96 h post-infection. Animals were then euthanized by pentobarbitone  
550 overdose and the kidneys and bladders removed and weighed. Tissue samples were  
551 homogenized using a Precellys 24 dual-bead beater in 2 ml ice cold sterile PBS. Homogenates  
552 and urine samples were quantitatively cultured onto MacConkey's agar plates and incubated at  
553 37°C for 24 h before colonies were counted. The data from the culture burdens were analyzed  
554 using appropriate non-parametric statistical models (Kruskal-Wallis using Conover-Inman to  
555 make all pairwise comparisons between groups) with StatsDirect software v. 2.7.8. and  
556 compared to pretreatment and vehicle controls.

557 **Mouse neutropenic IP sepsis model.** *Ethics statement:* All animal studies were performed under  
558 UK Home Office License P2BC7D240 with local ethical committee clearance. All studies were  
559 performed by technicians who completed parts A, B, and C of the UK Home Office Personal



560 License course and hold current personal licenses. All experiments were performed in dedicated  
561 Biohazard 2 facilities (this site holds a Certificate of Designation).

562 NOSO-502 was tested against *E. coli* ATCC BAA-2469 (MIC= 2 µg/ml) in a IP sepsis model by  
563 Evotec (Manchester, UK). Male CD1/ICR mice 25-30g (Charles River, UK) were allowed to  
564 acclimatize for 11 days. Mice were rendered neutropenic with two intraperitoneal injections of  
565 150 mg/kg cyclophosphamide four days before infection and 100 mg/kg one day before  
566 infection. Previously prepared frozen stocks of *E. coli* ATCC BAA-2469 were diluted immediately  
567 prior to infection to  $6.8 \times 10^7$  CFU/ml. Mice were infected by directly administering 0.5 ml  
568 inoculum ( $3.4 \times 10^7$  CFU/mouse) *via* intraperitoneal injection. Dose formulations of NOSO-502  
569 were prepared in 25 mM PBS. Treatment was initiated 1 h post-infection and NOSO-502 doses  
570 (4, 12, and 24 mg/kg) were administered once by subcutaneous injection. Tigecycline (MIC = 0.5  
571 µg/mL), administered at 40 mg/kg/dose SC BID, was included as a comparator and two doses  
572 were administered. Animals from the pretreatment groups were euthanized 1 h post-infection  
573 and all remaining mice were euthanized 25 h post-infection. The clinical condition and body  
574 weight of all remaining animals were assessed 25 h post-infection or when animals reached the  
575 ethical severity endpoint (whichever came first). Mice were anaesthetized using 2.5%  
576 isofluorane/97.5% oxygen followed by a pentobarbitone overdose. When mice were deeply  
577 unconscious, blood was collected from all animals under terminal cardiac puncture into EDTA  
578 blood tubes. In addition, an intraperitoneal wash with sterile PBS (2 ml IP injected, 1 ml removed  
579 for culture) was collected. Five mice were also euthanized by pentobarbitone overdose to  
580 provide a 1-h pretreatment control group. Blood and IP wash samples were quantitatively  
581 cultured onto CLED agar plates and incubated at 37°C for 24 h before colonies were counted.  
582 The data from the culture burdens were analyzed using appropriate non-parametric statistical

583 models (Kruskal-Wallis using Conover-Inman to make all pairwise comparisons between groups)  
584 with StatsDirect software v. 2.7.8. and compared to pretreatment and vehicle controls.

585 **Mouse lung infection model.** *Ethical statement:* All animal experiments were performed under  
586 UK Home Office License 40/3644, and with local ethical committee clearance (The University of  
587 Manchester AWERB). All experiments were performed by technicians who had completed at  
588 least parts 1 to 3 of the Home Office Personal License course and held current personal licenses.  
589 NOSO-502 was tested against *K. pneumoniae* NCTC 13442 (expresses OXA-48 carbapenemase,  
590 MIC= 1 µg/ml) in a neutropenic mouse pulmonary infection model by Evotec (Manchester, UK).  
591 Male CD-1/ICR mice 6-8 weeks old (Charles River UK) were allowed to acclimatize for 7 days,  
592 then rendered neutropenic by IP injection of cyclophosphamide (200 mg/kg on day 4 and 150  
593 mg/kg on day 1 before infection). Mice were infected by intranasal route ( $\sim 4 \times 10^6$  CFU/mouse)  
594 under parenteral anaesthesia. At 2 h, 8 h, 14 h and 20 h post infection, mice received treatments  
595 with NOSO-502 at 2, 6 or 20 mg/kg or with tigecycline at 40 mg/kg administered by SC route in  
596 a volume of 10 mL/kg (8 mice per dose). At 2 h post infection NOSO-502 was delivered once by  
597 SC route at 80 mg/kg in a volume of 10 mL/kg (8 mice). At 2 h post infection, one infected group  
598 was humanely euthanized, and lungs processed for pre-treatment quantitative culture to  
599 determine *Klebsiella* burdens. At 26 h post infection, all remaining mice were humanely  
600 euthanized. Lungs were aseptically removed, homogenized, serially diluted, and plated on CLED  
601 (cystine lactose electrolyte deficient) agar for CFU titers.

## 602 **ACKNOWLEDGMENTS**

603 Some of the research leading to these results was conducted as part of the ND4BB  
604 ENABLE Consortium and has received support from the Innovative Medicines Initiative  
605 Joint Undertaking under Grant no 11583, resources of which are comprised of  
606 financial contributions from the European Union's seventh framework program (FP7/2007-

607 2013) and EFPIA companies' in-kind contribution. The authors would like to thank Douglas  
608 Huseby, Diarmaid Hughes, Sha Cao, Richard Svensson, and Pawel Baranczewski from Uppsala  
609 University, Edgars Liepins, and Solveiga Grinberga from the Latvian Institute of organic synthesis  
610 for their contributions.

## 611 REFERENCES

- 612 1. Centers for Disease Control and Prevention. 2013. Antibiotic resistance threats in the  
613 United States. Centers for Disease Control and Prevention, Atlanta, GA. Available at:  
614 <http://www.cdc.gov/drugresistance/threat-report-2013/pdf/ar-threats-2013-508.pdf>.  
615 Accessed 26 November 2014.
- 616 2. Zhang Y, Wang Q, Yin Y, Chen H, Jin L, Gu B, Xie L, Yang C, Ma X, Li H, Li W, Zhang X, Liao  
617 K, Man S, Wang S, Wen H, Li B, Guo Z, Tian J, Pei F, Liu L, Zhang L, Zou C, Hu T, Cai J, Yang  
618 H, Huang J, Jia X, Huang W, Cao B, Wang H. 2018. Epidemiology of carbapenem-resistant  
619 *Enterobacteriaceae* infections: report from the China CRE Network. Antimicrob Agents  
620 Chemother 62(2): e01882-17. <http://dx.doi.org/10.1128/AAC.01882-17>.
- 621 3. Pantel L, Florin T, Dobosz-Bartoszek M, Racine E, Sarciaux M, Houard J, Campagne JM,  
622 Marcia de Figueiredo R, Gaudriault S, Givaudan A, Forst S, Aumelas A, Lautard L, Bolla JM,  
623 Vingsbo Lundberg C, Huseby D, Hughes D, Vázquez-Laslop N, Mankin AS, Polikanov YS,  
624 Gualtieri M. 2018. Odilorhabdins, a class of potent antibacterial agents, cause miscoding  
625 by binding at a new ribosomal site. Mol Cell 70:83-94.
- 626 4. Firsov AA, Vostrov SN, Shevchenko AA, Cornaglia G. 1997. Parameters of bacterial killing  
627 and regrowth kinetics and antimicrobial effect examined in terms of area under the  
628 concentration-time curve relationships: action of ciprofloxacin against *Escherichia coli* in  
629 an *in vitro* dynamic model. Antimicrob Agents Chemother 41:1281–1287.

- 630 5. Huang JX, Kaeslin G, Ranall MV, Blaskovich MA, Becker B, Butler MS, Little MH, Lash LH,  
631 Cooper MA. 2015. Evaluation of biomarkers for *in vitro* prediction of drug-induced  
632 nephrotoxicity: comparison of HK-2, immortalized human proximal tubule epithelial, and  
633 primary cultures of human proximal tubular cells. *Pharmacol Res Perspect* 3:e00148.  
634 <http://dx.doi.org/10.1002/prp2.148>
- 635 6. Vidyasagar A, Wilson NA, Diamali A. 2012. Heat shock protein 27 (HSP27): biomarker of  
636 disease and therapeutic target. *Fibrogenesis Tissue Repair* 5:7.  
637 <http://dx.doi.org/10.1186/1755-1536-5-7>.
- 638 7. Doherty AT. 2012. The *in vitro* micronucleus assays. *Methods Mol Biol* 817: 121-141.  
639 [http://dx.doi.org/10.1007/978-1-61779-421-6\\_7](http://dx.doi.org/10.1007/978-1-61779-421-6_7).
- 640 8. Capone A, Giannella M, Fortini D, Giordano A, Meledandri M, Ballardini M, Venditti M,  
641 Bordi E, Capozzi D, Balice MP, Tarasi A, Parisi G, Lappa A, Carattoli A, Petrosillo N. 2013.  
642 High rate of colistin resistance among patients with carbapenem-resistant *Klebsiella*  
643 *pneumoniae* infection accounts for an excess of mortality. *Clin Microbiol Infect* 19(1):  
644 E23-30. <http://dx.doi.org/10.1111/1469-0691.12070>.
- 645 9. Tumbarello M, Viale P, Viscoli C, Treccarichi EM, Tumietto F, Marchese A, Spanu T,  
646 Ambretti S, Ginocchio F, Cristini F, Losito AR, Tedeschi S, Cauda R, Bassetti M. 2012.  
647 Predictors of mortality in bloodstream infections caused by *Klebsiella pneumoniae*  
648 carbapenemase-producing *K. pneumoniae*: importance of combination therapy. *Clin*  
649 *Infect Dis* 55(7):943-950. <http://dx.doi.org/10.1093/cid/cis588>.
- 650 10. Tumbarello M, Treccarichi EM, De Rosa FG, Giannella M, Giacobbe DR, Bassetti M, Losito  
651 AR, Bartoletti M, Del Bono V, Corcione S, Maiuro G, Tedeschi S, Celani L, Cardellino CS,  
652 Spanu T, Marchese A, Ambretti S, Cauda R, Viscoli C, Viale P. 2015. Infections caused by  
653 KPC-producing *Klebsiella pneumoniae*: differences in therapy and mortality in a

- 654 multicentre study. J Antimicrob Chemother 70(7):2133-43.  
655 <http://dx.doi.org/10.1093/jac/dkv086>.
- 656 11. Daikos GL, Tsaousi S, Tzouveleakis LS, Anyfantis I, Psychogiou M, Argyropoulou A, Stefanou  
657 I, Sypsa V, Miriagou V, Nepka M, Georgiadou S, Markogiannakis A, Goukos D, Skoutelis  
658 A. 2014. Carbapenemase-producing *Klebsiella pneumoniae* bloodstream infections:  
659 lowering mortality by antibiotic combination schemes and the role of carbapenems.  
660 Antimicrob Agents Chemother 58(4):2322-8. <http://dx.doi.org/10.1128/AAC.02166-13>.
- 661 12. Falcone M, Russo A, Iacovelli A, Restuccia G, Ceccarelli G, Giordano A, Farcomeni A,  
662 Morelli A, Venditti M. 2016. Predictors of outcome in ICU patients with septic shock  
663 caused by *Klebsiella pneumoniae* carbapenemase-producing *K. pneumoniae*. Clin  
664 Microbiol Infect 22(5):444-50. <http://dx.doi.org/10.1016/j.cmi.2016.01.016>.
- 665 13. Gomez-Simmonds A, Nelson B, Eiras DP, Loo A, Jenkins SG, Whittier S, Calfee DP, Satlin  
666 MJ, Kubin CJ, Furuya EY. 2016. Combination regimens for treatment of carbapenem-  
667 resistant *Klebsiella pneumoniae* bloodstream infections. Antimicrob Agents Chemother  
668 60(6):3601-7. <http://dx.doi.org/10.1128/AAC.03007-15>.
- 669 14. Kontopidou F, Giamarellou H, Katerelos P, Maragos A, Kioumis I, Trikka-Graphakos E,  
670 Valakis C, Maltezou HC. 2014. Infections caused by carbapenem-resistant *Klebsiella*  
671 *pneumoniae* among patients in intensive care units in Greece: a multi-centre study on  
672 clinical outcome and therapeutic options. Clin Microbiol Infect 20(2):117-123.  
673 <http://dx.doi.org/10.1111/1469-0691.12341>.
- 674 15. Qureshi ZA, Paterson DL, Potoski BA, Kilayko MC, Sandovsky G, Sordillo E, Polsky B,  
675 Adams-Haduch JM, Doi Y. 2012. Treatment outcome of bacteremia due to KPC-producing  
676 *Klebsiella pneumoniae*: superiority of combination antimicrobial regimens. Antimicrob  
677 Agents Chemother 56(4):2108-13. <http://dx.doi.org/10.1128/AAC.06268-11>.

- 678 16. Trecarichi EM, Pagano L, Martino B, Candoni A, Di Blasi R, Nadali G, Fianchi L, Delia M,  
679 Sica S, Perriello V, Busca A, Aversa F, Fanci R, Melillo L, Lessi F, Del Principe MI, Cattaneo  
680 C, Tumbarello M. 2016. Bloodstream infections caused by *Klebsiella pneumoniae* in onco-  
681 hematological patients: clinical impact of carbapenem resistance in a multicentre  
682 prospective survey. *Am J Hematol* 91(11):1076-81. <http://dx.doi.org/10.1002/ajh.24489>.
- 683 17. Zarkotou O, Pournaras S, Tselioti P, Dragoumanos V, Pitiriga V, Ranellou K, Prekates A,  
684 Themeli-Digalaki K, Tsakris A. 2011. Predictors of mortality in patients with bloodstream  
685 infections caused by KPC-producing *Klebsiella pneumoniae* and impact of appropriate  
686 antimicrobial treatment. *Clin Microbiol Infect* 17(12):1798-803.  
687 <http://dx.doi.org/10.1111/j.1469-0691.2011.03514.x>.
- 688 18. Falcone M, Paterson D. 2016. Spotlight on ceftazidime/avibactam: a new option for MDR  
689 Gram-negative infections. *J Antimicrob Chemother* 71(10):2713-22.  
690 <http://dx.doi.org/10.1093/jac/dkw239>.
- 691 19. Bassetti M, Peghin M, Pecori D. 2016. The management of multidrug-resistant  
692 *Enterobacteriaceae*. *Curr Opin Infect Dis* 29(6):583-94.  
693 <http://dx.doi.org/10.1097/QCO.0000000000000314>.
- 694 20. Van Duin D, Doi Y. 2016. The global epidemiology of carbapenemase-producing  
695 *Enterobacteriaceae*. *Virulence* 11:1-10.  
696 <http://dx.doi.org/10.1080/21505594.2016.1222343>.
- 697 21. Viale P, Giannella M, Lewis R, Trecarichi EM, Petrosillo N, Tumbarello M. 2013. Predictors  
698 of mortality in multidrug-resistant *Klebsiella pneumoniae* bloodstream infections. *Expert*  
699 *Rev Anti Infect Ther* 11(10):1053-63. <http://dx.doi.org/10.1586/14787210.2013.836057>.
- 700 22. Tängdén T, Giske CG. 2015. Global dissemination of extensively drug-resistant  
701 carbapenemase-producing *Enterobacteriaceae*: clinical perspectives on detection,

- 702 treatment and infection control. J Intern Med 277(5):501-12.  
703 <http://dx.doi.org/10.1111/joim.12342>.
- 704 23. Tzouveleakis LS, Markogiannakis A, Psychogiou M, Tassios PT, Daikos GL. 2012.  
705 Carbapenemases in *Klebsiella pneumoniae* and other *Enterobacteriaceae*: an evolving  
706 crisis of global dimensions. Clin Microbiol Rev 25(4):682-707.  
707 <http://dx.doi.org/10.1128/CMR.05035-11>.
- 708 24. Cantón R, Akóva M, Carmeli Y, Giske CG, Glupczynski Y, Gniadkowski M, Livermore DM,  
709 Miriagou V, Naas T, Rossolini GM, Samuelsen Ø, Seifert H, Woodford N, Nordmann P;  
710 European Network on Carbapenemases. 2012. Rapid evolution and spread of  
711 carbapenemases among *Enterobacteriaceae* in Europe. Clin Microbiol Infect 18(5):413-  
712 31. <http://dx.doi.org/10.1111/j.1469-0691.2012.03821.x>.
- 713 25. Petrosillo N, Giannella M, Lewis R, Viale P. 2013. Treatment of carbapenem-resistant  
714 *Klebsiella pneumoniae*: the state of the art. Expert Rev Anti Infect Ther 11(2):159-77.
- 715 26. Tzouveleakis LS, Markogiannakis A, Piperaki E, Souli M, Daikos GL. 2014. Treating  
716 infections caused by carbapenemase-producing *Enterobacteriaceae*. Clin Microbiol  
717 Infect 20(9):862-72. <http://dx.doi.org/10.1111/1469-0691.12697>.
- 718 27. Van Duin D, Kaye KS, Neuner EA, Bonomo RA. 2013. Carbapenem-resistant  
719 *Enterobacteriaceae*: a review of treatment and outcomes. Diagn Microbiol Infect Dis  
720 75(2):115-20. <http://dx.doi.org/10.1016/j.diagmicrobio.2012.11.009>.
- 721 28. Giacobbe DR, Del Bono V, Treccarichi EM, De Rosa FG, Giannella M, Bassetti M, Bartoloni  
722 A, Losito AR, Corcione S, Bartoletti M, Mantengoli E, Saffioti C, Pagani N, Tedeschi S,  
723 Spanu T, Rossolini GM, Marchese A, Ambretti S, Cauda R, Viale P, Viscoli C, Tumbarello  
724 M. 2015. Risk factors for bloodstream infections due to colistin-resistant KPC-producing

- 725           *Klebsiella pneumoniae*: results from a multicenter case-control-control study. Clin  
726           Microbiol Infect 21(12):1106. <http://dx.doi.org/10.1016/j.cmi.2015.08.001>.
- 727           29. Humes HD. 1988. Aminoglycoside nephrotoxicity. Kidney Int 33:900-911.
- 728           30. Moore RD, Smith CR, Lipsky JJ, Mellits ED, Lietman PS. 1984. Risk factors for  
729           nephrotoxicity in patients treated with aminoglycosides. Ann Intern Med 100:352-357.
- 730           31. Kelesidis T, Falagas ME. 2015. The safety of polymyxin antibiotics. Expert Opin Drug Saf  
731           14:1687–1701. <http://dx.doi.org/10.1517/14740338.2015.1088520>.
- 732           32. Falagas ME, Kasiakou SK. 2006. Toxicity of polymyxins: a systematic review of the  
733           evidence from old and recent studies. Crit Care 10(1):R27.
- 734           33. Nation RL, Velkov T, Li J. 2014. Colistin and polymyxin B: peas in a pod, or chalk and  
735           cheese? Clin Infect Dis 59:88–94. <http://dx.doi.org/10.1093/cid/ciu213>.
- 736           34. Galløe AM, Graudal N, Christensen HR, Kampmann JP. 1995. Aminoglycosides: single or  
737           multiple daily dosing? A meta-analysis on efficacy and safety. Eur J Clin Pharmacol 48:39.
- 738           35. Iannini PB. 2002. Cardiotoxicity of macrolides, ketolides and fluoroquinolones that  
739           prolong the QTc interval. Expert Opin Drug Saf 1(2):121-8.
- 740           36. Fosgerau K, Hoffmann T. 2015. Peptide therapeutics: current status and future  
741           directions. Drug Discov Today 20: 122-8.  
742           <http://dx.doi.org/10.1016/j.drudis.2014.10.003>.
- 743           37. Kapar A.A., Reichert J.H. 2013. Future direction for peptide therapeutics development.  
744           Drug Discov Today 18: 807-17. <http://dx.doi.org/10.1016/j.drudis.2013.05.011>.
- 745           38. Clinical and Laboratory Standards Institute. 2012. Methods for dilution antimicrobial  
746           susceptibility tests for bacteria that grow aerobically; approved standard—10<sup>th</sup> ed. CLSI  
747           document M07-A10 Clinical and Laboratory Standards Institute, Wayne, PA



- 748 39. Clinical and Laboratory Standards Institute. 1999. Methods for determining bactericidal  
749 activity of antimicrobial agents; Approved Guideline M 26-A Clinical and Laboratory  
750 Standards Institute, Wayne, PA
- 751 40. Xia M, Huang R, Witt KL, Southall N, Fostel J, Cho MH, Jadhav A, Smith CS, Inglese J, Portier  
752 CJ, Tice RR, Austin CP. 2008. Compound cytotoxicity profiling using quantitative high-  
753 throughput screening. *Environ Health Perspect* 116(3):284-91.  
754 <http://dx.doi.org/10.1289/ehp.10727>.
- 755 41. Mathes C. 2006. QPatch: the past, present and future of automated patch clamp. *Expert*  
756 *Opin Ther Targets* 10 (2): 230-241.
- 757 42. Diaz D, Scott A, Carmichael P, Shi W, Costales C. 2007. Evaluation of an automated *in vitro*  
758 micronucleus assay in CHO-K1 cells. *Mutat Res* 630: 1-13.  
759 <http://dx.doi.org/10.1016/j.mrgentox.2007.02.006>.
- 760
- 761
- 762
- 763
- 764
- 765
- 766
- 767
- 768
- 769

770 **Figure 1.** Chemical structure of NOSO-502

771 **Figure 2.** Bactericidal activity of NOSO-502 at 4× and 8× MIC against *E. coli* ATCC 25922 and *K.*  
772 *pneumoniae* ATCC 43816. Closed circles, drug-free control; closed squares, NOSO-502 at 4× MIC;  
773 closed triangles, NOSO-502 at 8× MIC. Experiments were performed in triplicate. Each symbol  
774 represents the mean and error bars indicate the standard error of the mean.

775 **Figure 3.** Pharmacokinetic studies with CD-1 mice (closed squares) and SD rats (closed circles)  
776 following intravenous dosing at 30 and 15 mg/kg respectively. Each symbol represents the mean  
777 and error bars indicate the standard error of the mean.

778 **Figure 4.** Efficacy of NOSO-502 and colistin in a neutropenic murine sepsis infection model  
779 against *E. coli* EN122. Each symbol represents an individual mouse and the horizontal line  
780 indicates the mean. Error bars indicate the standard error of the mean. Statistically significant  
781 reduction versus vehicle control (One-way ANOVA, Dunnett's comparison): ns, not significant; \*,  
782  $p \leq 0.05$ ; \*\*,  $p \leq 0.01$ ; \*\*\*,  $p \leq 0.001$ ; \*\*\*\*,  $p \leq 0.0001$ .

783 **Figure 5.** Efficacy of NOSO-502 and ciprofloxacin in a murine UTI model against *E. coli* UTI89.  
784 Each symbol represents an individual mouse and the horizontal line indicates the mean. Error  
785 bars indicate the standard error of the mean. Statistically significant reduction versus vehicle  
786 control (Kruskal-Wallis statistical test, multiple comparison): ns, not significant; \*,  $p \leq 0.05$ ; \*\*,  $p$   
787  $\leq 0.01$ ; \*\*\*,  $p \leq 0.001$ ; \*\*\*\*,  $p \leq 0.0001$ .

788 **Figure 6.** Efficacy of NOSO-502 and tigecycline in a survival neutropenic sepsis infection model  
789 against *E. coli* ATCC BAA-2469 (NDM-1). Each symbol represents an individual mouse and the  
790 horizontal line indicates the mean. Error bars indicate the standard error of the mean.  
791 Statistically significant reduction versus vehicle control (Kruskal-Wallis statistical test, multiple  
792 comparison): ns, not significant; \*,  $p \leq 0.05$ ; \*\*,  $p \leq 0.01$ ; \*\*\*,  $p \leq 0.001$ ; \*\*\*\*,  $p \leq 0.0001$ .

793 **Figure 7.** Efficacy of NOSO-502 and tigecycline in a murine lung infection model against *K.*  
794 *pneumoniae* NCTC 13442 (OXA-48). Each symbol represents an individual mouse and the  
795 horizontal line indicates the mean. Error bars indicate the standard error of the mean. Statistically  
796 significant reduction *versus* vehicle control (One-way ANOVA, Dunnett's comparison): ns, not significant;  
797 \*,  $p \leq 0.05$ ; \*\*,  $p \leq 0.01$ ; \*\*\*,  $p \leq 0.001$ ; \*\*\*\*,  $p \leq 0.0001$ .

798 **Table 1.** Bacterial susceptibility profile of NOSO-502 against reference bacterial strains. NOS:  
799 NOSO-502, CIP: ciprofloxacin, GEN: gentamicin, PMB: polymyxin B, IPM: imipenem, TGC:  
800 tigecycline.

801 **Table 2.** MIC<sub>90</sub> of NOSO-502 and comparators against a panel of recent clinical bacterial strains.  
802 NOS: NOSO-502, CIP: ciprofloxacin, GEN: gentamicin, PMB: polymyxin B. MIC<sub>50</sub> and MIC<sub>90</sub> were  
803 calculated for populations >10 isolates.

804 **Table 3.** Activity of NOSO-502 and comparators against carbapenem-resistant  
805 *Enterobacteriaceae* strains. NOS: NOSO-502, CIP: ciprofloxacin, GEN: gentamicin, IPM:  
806 imipenem, TGC: tigecycline, PMB: polymyxin B.

807 **Table 4.** Bacterial susceptibility profile of NOSO-502 against colistin-resistant strains. NOS:  
808 NOSO-502, CST: colistin.



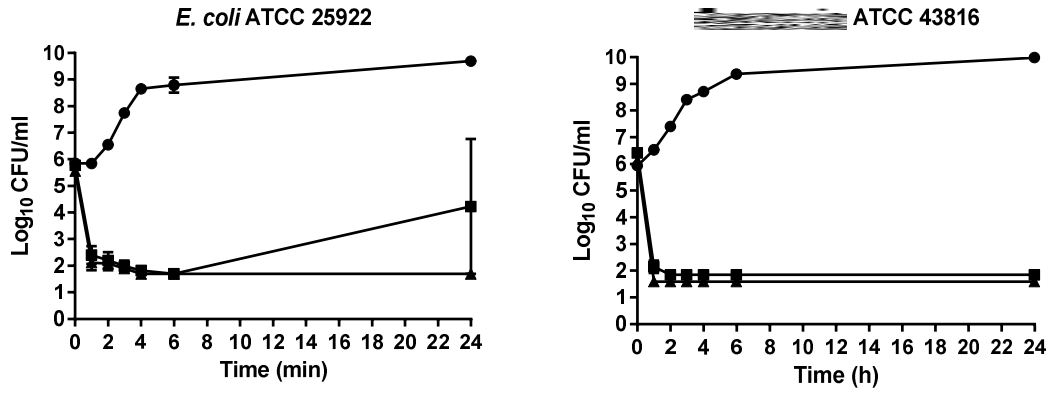

**Figure 2.** Bactericidal activity of NOSO-502 at 4× and 8× MIC against *E. coli* ATCC 25922 and *K. pneumoniae* ATCC 43816. Closed circles, drug-free control; closed squares, NOSO-502 at 4× MIC; closed triangles, NOSO-502 at 8× MIC. Experiments were performed in triplicate. Each symbol represents the mean and error bars indicate the standard error of the mean.

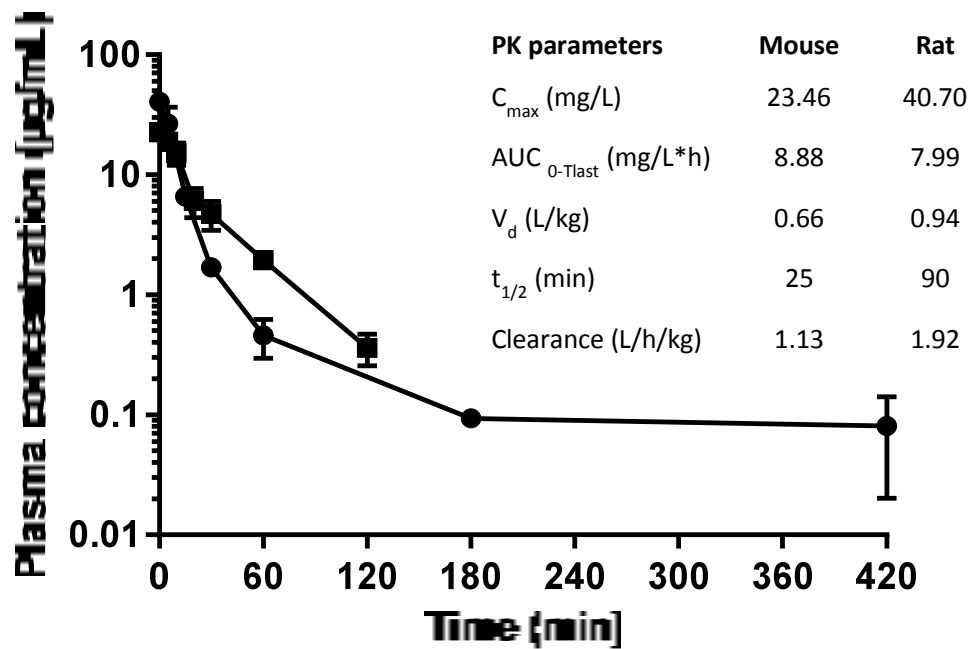

**Figure 3.** Pharmacokinetic studies with CD-1 mice (closed squares) and SD rats (closed circles) following intravenous dosing at 30 and 15 mg/kg respectively. Each symbol represents the mean and error bars indicate the standard error of the mean.

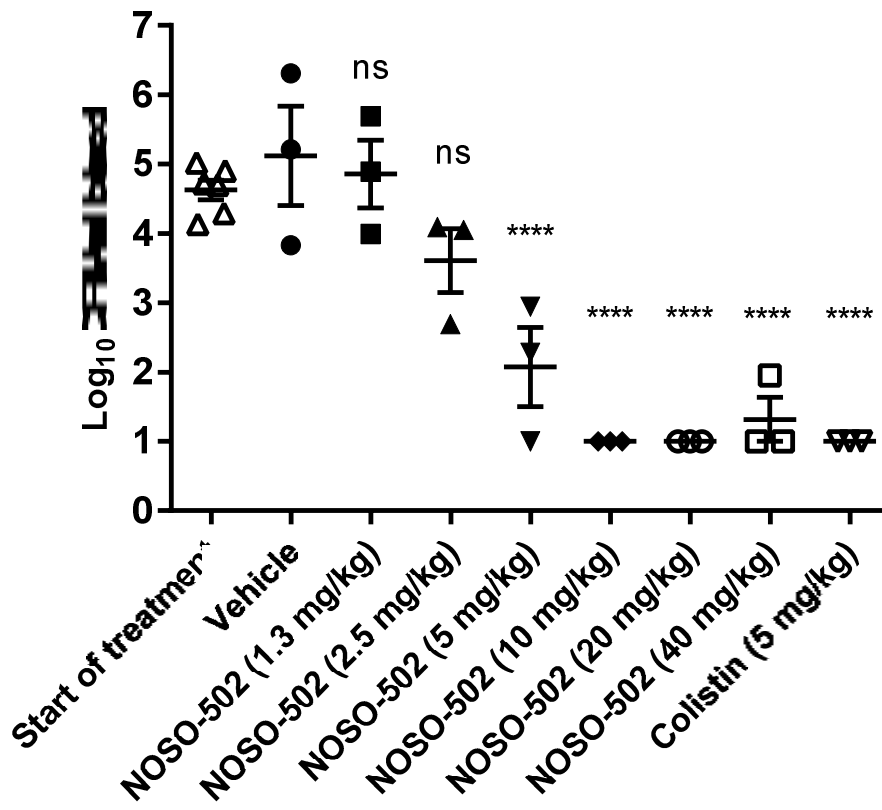

**Figure 4.** Efficacy of NOSO-502 and colistin in a neutropenic murine sepsis infection model *against E. coli* EN122. Each symbol represents an individual mouse and the horizontal line indicates the mean. Error bars indicate the standard error of the mean. Statistically significant reduction *versus* vehicle control (One-way ANOVA, Dunnett's comparison): ns, not significant; \*,  $p \leq 0.05$ ; \*\*,  $p \leq 0.01$ ; \*\*\*,  $p \leq 0.001$ ; \*\*\*\*,  $p \leq 0.0001$ .

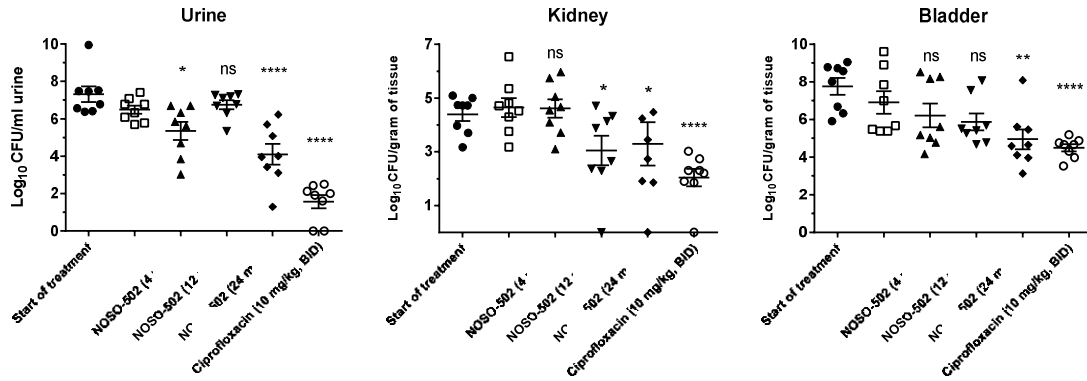

**Figure 5.** Efficacy of NOSO-502 and ciprofloxacin in a murine UTI model against *E. coli* UT189. Each symbol represents an individual mouse and the horizontal line indicates the mean. Error bars indicate the standard error of the mean. Statistically significant reduction *versus* vehicle control (Kruskal-Wallis statistical test, multiple comparison): ns, not significant; \*,  $p \leq 0.05$ ; \*\*,  $p \leq 0.01$ ; \*\*\*,  $p \leq 0.001$ ; \*\*\*\*,  $p \leq 0.0001$ .



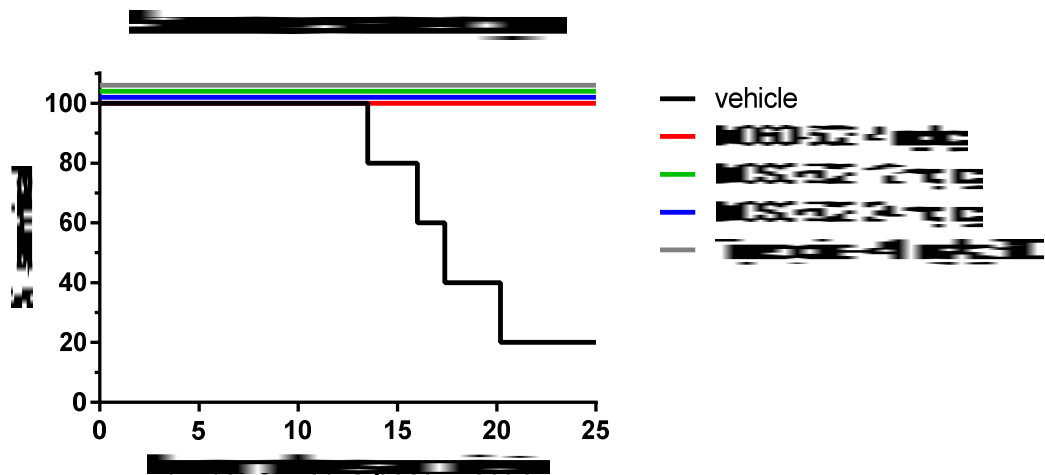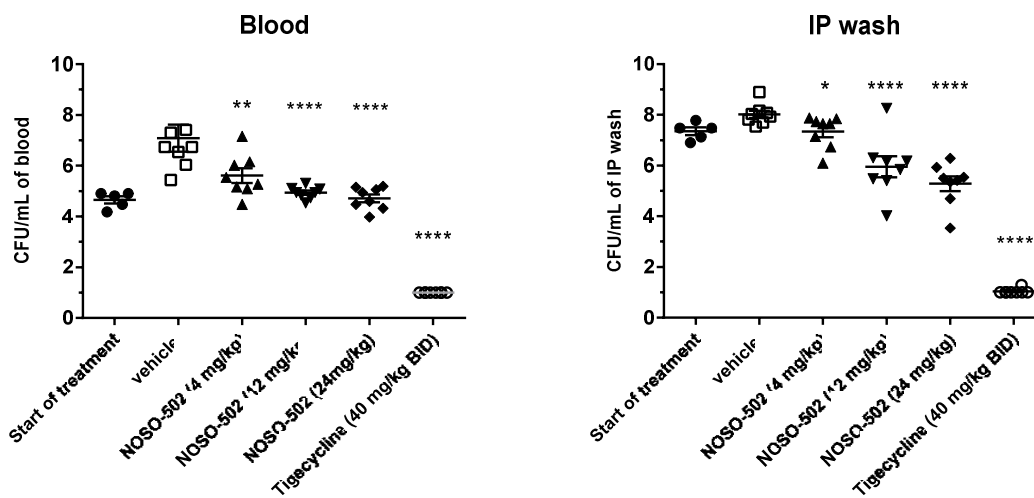

**Figure 6.** Efficacy of NOSO-502 and tigecycline in a survival neutropenic sepsis infection model against *E. coli* ATCC BAA-2469 (NDM-1). Each symbol represents an individual mouse and the horizontal line indicates the mean. Error bars indicate the standard error of the mean. Statistically significant reduction *versus* vehicle control (Kruskal-Wallis statistical test, multiple comparison): ns, not significant; \*,  $p \leq 0.05$ ; \*\*,  $p \leq 0.01$ ; \*\*\*,  $p \leq 0.001$ ; \*\*\*\*,  $p \leq 0.0001$ .

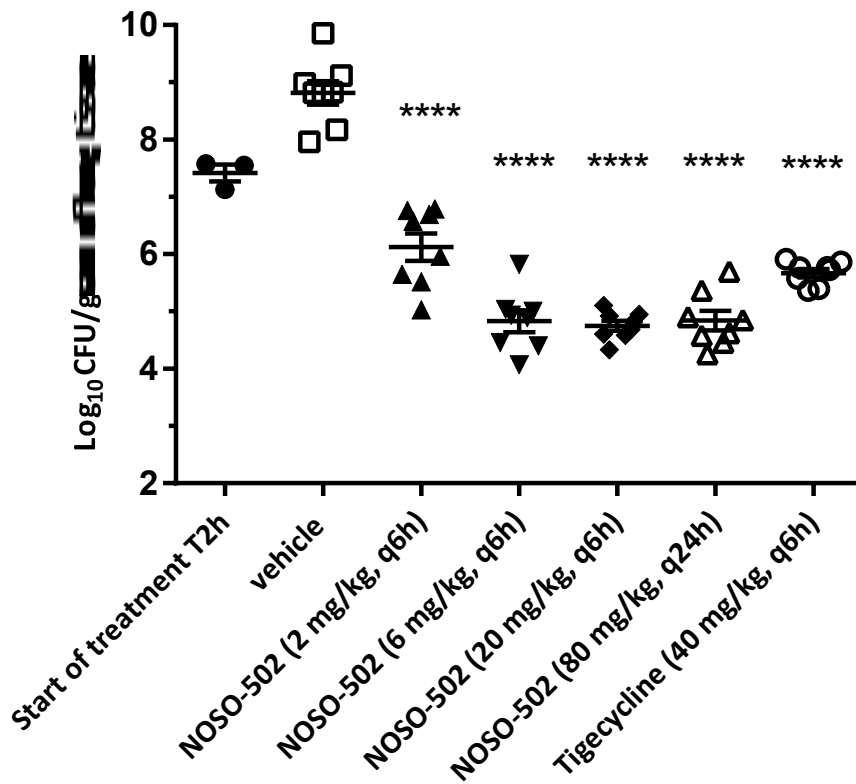

**Figure 7.** Efficacy of NOSO-502 and tigecycline in a murine lung infection model against *K. pneumoniae* NCTC 13442 (OXA-48). Each symbol represents an individual mouse and the horizontal line indicates the mean. Error bars indicate the standard error of the mean. Statistically significant reduction *versus* vehicle control (One-way ANOVA, Dunnett's comparison): ns, not significant; \*,  $p \leq 0.05$ ; \*\*,  $p \leq 0.01$ ; \*\*\*,  $p \leq 0.001$ ; \*\*\*\*,  $p \leq 0.0001$ .

| Strain                                       | MIC ( $\mu\text{g/ml}$ ) of antibiotics |              |              |              |       |      |
|----------------------------------------------|-----------------------------------------|--------------|--------------|--------------|-------|------|
|                                              | NOS                                     | CIP          | GEN          | IPM          | TGC   | PMB  |
| <i>Citrobacter freundii</i> DSM 30039        | 2                                       | $\leq 0.125$ | 0.5          | 1            | 1     | 0.5  |
| <i>Citrobacter kozeri</i> DSM 4595           | 2                                       | $\leq 0.125$ | 0.25         | 4            | 1     | 0.25 |
| <i>Enterobacter aerogenes</i> DSM 30053      | 2                                       | $\leq 0.125$ | 0.25         | 2            | 1     | 0.5  |
| <i>Enterobacter cloacae</i> DSM 14563        | 2                                       | $\leq 0.125$ | 0.5          | 1            | 4     | 1    |
| <i>Escherichia coli</i> ATCC 25922           | 4                                       | $\leq 0.125$ | 1            | 0.25         | 0.25  | 0.5  |
| <i>Klebsiella pneumoniae</i> ATCC 43816      | 1                                       | $\leq 0.125$ | 0.25         | 1            | 2     | 1    |
| <i>Serratia marcescens</i> DSM 17174         | 4                                       | $\leq 0.125$ | 0.5          | 2            | 4     | >32  |
| <i>Acinetobacter baumannii</i> ATCC 19606    | >64                                     | 2            | 16           | 0.5          | 1     | 0.5  |
| <i>Pseudomonas aeruginosa</i> DSM 1117       | >64                                     | 1            | 1            | 2            | >8    | 1    |
| <i>Stenotrophomas maltophilia</i> ATCC 13637 | 16                                      | 1            | 4            | >64          | 0.5   | 1    |
| <i>Enterococcus faecalis</i> DSM 2570        | >64                                     | 2            | 16           | 1            | 0.25  | >32  |
| <i>Enterococcus faecium</i> DSM 20477        | 64                                      | 16           | 8            | 4            | 0.125 | >32  |
| <i>Staphylococcus aureus</i> ATCC 29213      | 1                                       | 0.25         | 0.5          | $\leq 0.125$ | 0.5   | 16   |
| <i>Staphylococcus epidermidis</i> ATCC 12228 | 0.25                                    | 0.25         | $\leq 0.125$ | $\leq 0.125$ | 0.5   | 16   |
| <i>Streptococcus pneumoniae</i> DSM 2134     | 64                                      | 1            | 8            | $\leq 0.125$ | 0.125 | >32  |

**Table 1.** Bacterial susceptibility profile of NOSO-502 against reference bacterial strains. NOS: NOSO-502, CIP: ciprofloxacin, GEN: gentamicin, PMB: polymyxin B, IPM: imipenem, TGC: tigecycline.

| Organsim (No. of isolates)                        | Antibiotic | Range    | MIC ( $\mu\text{g/ml}$ ) |     |
|---------------------------------------------------|------------|----------|--------------------------|-----|
|                                                   |            |          | 50%                      | 90% |
| <i>Citrobacter freundii</i> (16)                  | NOS        | 1-4      | 2                        | 2   |
|                                                   | CIP        | 0.008->1 | 0.03                     | >1  |
|                                                   | GEN        | 0.5->32  | 1                        | >32 |
|                                                   | PMB        | 0.25-1   | 0.5                      | 1   |
| <i>Enterobacter cloacae</i> (13)                  | NOS        | 1-4      | 1                        | 2   |
|                                                   | CIP        | 0.016->1 | >1                       | >1  |
|                                                   | GEN        | 1->32    | 32                       | >32 |
|                                                   | PMB        | 0.5-16   | 0.5                      | 8   |
| <i>Escherichia coli</i> (101)                     | NOS        | 2-32     | 4                        | 8   |
|                                                   | CIP        | 0.008->1 | 0.03                     | >1  |
|                                                   | GEN        | 0.5->32  | 1                        | 2   |
|                                                   | PMB        | 0.25-32  | 0.5                      | 1   |
| Ciprofloxacin-resistant <i>E. coli</i> (19)       | NOS        | 2-32     | 4                        | 8   |
|                                                   | CIP        | >1       | >1                       | >1  |
|                                                   | GEN        | 0.13->32 | 0.5                      | >32 |
|                                                   | PMB        | 0.5-32   | 0.5                      | 1   |
| Gentamicin-resistant <i>E. coli</i> (6)           | NOS        | 4        | -                        | -   |
|                                                   | CIP        | 0.25-1   | -                        | -   |
|                                                   | GEN        | 32->32   | -                        | -   |
|                                                   | PMB        | 0.25-32  | -                        | -   |
| Polymyxin B-resistant <i>E. coli</i> (2)          | NOS        | 4-8      | -                        | -   |
|                                                   | CIP        | 1->1     | -                        | -   |
|                                                   | GEN        | 1->32    | -                        | -   |
|                                                   | PMB        | 4-32     | -                        | -   |
| <i>Klebsiella pneumoniae</i> (56)                 | NOS        | 0.5-16   | 1                        | 2   |
|                                                   | CIP        | 0.008->1 | 0.5                      | >1  |
|                                                   | GEN        | 0.5->32  | 1                        | >32 |
|                                                   | PMB        | 0.25-32  | 0.5                      | 4   |
| Ciprofloxacin-resistant <i>K. pneumoniae</i> (27) | NOS        | 0.5-16   | 1                        | 2   |
|                                                   | CIP        | >1       | >1                       | >1  |
|                                                   | GEN        | 0.13->32 | 32                       | >32 |
|                                                   | PMB        | 0.5->32  | 0.5                      | 1   |
| Gentamicin-resistant <i>K. pneumoniae</i> (16)    | NOS        | 0.5-2    | 1                        | 2   |
|                                                   | CIP        | 0.5->1   | >1                       | >1  |
|                                                   | GEN        | 32->32   | >32                      | >32 |
|                                                   | PMB        | 0.5-1    | 0.5                      | 1   |

**Table 2.** MIC<sub>90</sub> of NOSO-502 and comparators against a panel of recent clinical bacterial strains. NOS: NOSO-502, CIP: ciprofloxacin, GEN: gentamicin, PMB: polymyxin B. MIC<sub>50</sub> and MIC<sub>90</sub> were calculated for populations >10 isolates.

| Strain                                     | $\beta$ -lactamase content                        | MIC ( $\mu$ g/ml) of antibiotics |       |      |     |      |      |
|--------------------------------------------|---------------------------------------------------|----------------------------------|-------|------|-----|------|------|
|                                            |                                                   | NOS                              | CIP   | GEN  | IPM | TGC  | PMB  |
| <b>Ambler class A carbapenemase</b>        |                                                   |                                  |       |      |     |      |      |
| <i>Escherichia coli</i> PSP                | KPC-2 + TEM-1 + OXA-1                             | 2                                | 16    | >64  | 8   | 0.5  | 0.5  |
| <i>Escherichia coli</i> COL                | KPC-2 + TEM-1 + CTX-M9                            | 2                                | >64   | >64  | 8   | 0.5  | 0.5  |
| <i>Escherichia coli</i> MIN                | KPC-3 + OXA-9                                     | 4                                | <0.25 | 0.5  | 8   | 0.25 | 0.5  |
| <i>Klebsiella pneumoniae</i> ATCC BAA-1905 | KPC-2                                             | 1                                | >64   | 32   | >64 | 4    | 0.5  |
| <i>Klebsiella pneumoniae</i> A33504        | KPC-2+ SHV-11 + TEM-1 + CTX-M-2 + OXA-9           | 1                                | 32    | >64  | 16  | 2    | 0.5  |
| <i>Klebsiella pneumoniae</i> ATCC BAA-1904 | KPC-3                                             | 2                                | 0.25  | 16   | 32  | 2    | 0.5  |
| <i>Enterobacter cloacae</i> KBM15          | KPC-2 + TEM-1 + OXA-9                             | 1                                | 32    | 8    | 32  | 8    | 0.5  |
| <b>Ambler class B carbapenemase</b>        |                                                   |                                  |       |      |     |      |      |
| <i>Escherichia coli</i> BAA-2469           | NDM-1                                             | 2                                | 16    | >64  | 32  | 1    | 0.25 |
| <i>Escherichia coli</i> BAA-2471           | NDM-1                                             | 4                                | >64   | >64  | >64 | 1    | 0.25 |
| <i>Escherichia coli</i> MON                | NDM-5 + CTX-M15 + TEM-1                           | 4                                | >64   | 0.5  | 32  | 0.5  | 0.5  |
| <i>Escherichia coli</i> GAL                | NDM-6 + OXA-1 + CTX-M15                           | 2                                | >64   | 2    | 32  | 0.5  | 0.25 |
| <i>Escherichia coli</i> EGB957             | VIM-1 + OXA-48 + TEM-1 + CMY-4 + OXA-1            | 4                                | >64   | >64  | >64 | 1    | 0.5  |
| <i>Klebsiella pneumoniae</i> ATCC BAA-2146 | NDM-1 + CTX-M15 + TEM-1 + CMY-6 + OXA-1 + SHV-1   | 0.5                              | >64   | >64  | >64 | 32   | 1    |
| <i>Klebsiella pneumoniae</i> NCTC 13443    | NDM-1                                             | 1                                | >64   | >64  | >64 | 4    | 0.5  |
| <i>Klebsiella pneumoniae</i> LAM           | NDM-4 + SHV-11 + CTX-M15                          | 1                                | >64   | >64  | 32  | 2    | 0.5  |
| <i>Klebsiella pneumoniae</i> NCTC 13439    | VIM-1                                             | 1                                | 16    | 1    | 32  | 2    | 0.5  |
| <i>Enterobacter cloacae</i> 3047           | NDM-1 + CTX-M15 + TEM-1 + OXA-1                   | 1                                | 2     | 32   | 16  | 4    | 0.5  |
| <b>Ambler class C carbapenem-resistant</b> |                                                   |                                  |       |      |     |      |      |
| <i>Enterobacter cloacae</i> 10.72          | AmpC overexpressed + TEM-1 + OXA-1                | 1                                | >64   | >64  | 4   | 8    | 0.5  |
| <i>Citrobacter freundii</i> MAU            | AmpC overexpressed + TEM-3                        | 1                                | >64   | 2    | 4   | 8    | 0.5  |
| <b>Ambler class D carbapenemase</b>        |                                                   |                                  |       |      |     |      |      |
| <i>Escherichia coli</i> DOV                | OXA-48 + TEM-1 + CTX-M15 + OXA-1                  | 2                                | >64   | 32   | 4   | 2    | 0.5  |
| <i>Klebsiella pneumoniae</i> NCTC 13442    | OXA-48                                            | 1                                | 4     | 0.25 | 16  | 2    | 0.5  |
| <i>Klebsiella pneumoniae</i> DUB           | OXA-48 + CTX-M15 + TEM-1 + SHV-1 + OXA-1 + CMY-2  | 0.5                              | >64   | >64  | 16  | 4    | 0.5  |
| <i>Enterobacter cloacae</i> YAM            | OXA-48 + CTX-M15 + TEM-1 + OXA-1 + DHA-1          | 2                                | >64   | >64  | 4   | 4    | 1    |
| <i>Enterobacter cloacae</i> BEU            | OXA-48 + CTX-M15 + SHV-12 + TEM-1 + OXA-1 + DHA-1 | 1                                | 32    | >64  | 16  | 16   | 16   |

**Table 3.** Activity of NOSO-502 and comparators against carbapenem-resistant *Enterobacteriaceae* strains. NOS: NOSO-502, CIP: ciprofloxacin, GEN: gentamicin, IPM: imipenem, TGC: tigecycline, PMB: polymyxin B.

| Strain-Gene mutation or gene conferring resistance (No. of isolates)    | MIC range (µg/ml) |          |
|-------------------------------------------------------------------------|-------------------|----------|
|                                                                         | NOS               | CST      |
| <b><i>Escherichia coli</i> colistin-resistant (25)</b>                  |                   |          |
| <i>E. coli-mcr-1</i> (21)                                               | 1-4               | 4-16     |
| <i>E. coli-mcr-2</i> (1)                                                | 1                 | 8        |
| <i>E. coli-mcr-3</i> (1)                                                | 1                 | 16       |
| <i>E. coli-Unknown</i> (2)                                              | 1-2               | 16       |
| <b><i>Klebsiella pneumoniae</i> colistin-resistant (46)</b>             |                   |          |
| <i>K. pneumoniae-pmrA</i> G53S substitution (2)                         | 1-2               | 32-128   |
| <i>K. pneumoniae-pmrB</i> T157P substitution (6)                        | 0.25-16           | 8-32     |
| <i>K. pneumoniae-pmrB</i> L17Q substitution (1)                         | 1                 | 32       |
| <i>K. pneumoniae-phoQ</i> R16C substitution (1)                         | 2                 | >128     |
| <i>K. pneumoniae-mgrB</i> full deletion (5)                             | 0.5-1             | 16->128  |
| <i>K. pneumoniae-mgrB</i> premature termination (6)                     | 0.5-1             | 32-128   |
| <i>K. pneumoniae-mgrB</i> IS5 between +74 and +75 (4)                   | 0.5-2             | 16-128   |
| <i>K. pneumoniae-mgrB</i> W20R substitution (1)                         | 0.5               | 32       |
| <i>K. pneumoniae-mgrB</i> W47R substitution (1)                         | 1                 | 8        |
| <i>K. pneumoniae-mgrB</i> IS1R into promotor between -45 and -46 (3)    | 0.5-1             | 32-128   |
| <i>K. pneumoniae-mgrB</i> M27K substitution (1)                         | 2                 | 32       |
| <i>K. pneumoniae-mgrB</i> N42Y and K43I substitutions (1)               | 2                 | 32       |
| <i>K. pneumoniae-mgrB</i> ISKpn14 into promotor between -28 and -29 (2) | 0.5-2             | 64       |
| <i>K. pneumoniae-mgrB</i> IS903B between +69 and +70 (2)                | 0.25-1            | 64       |
| <i>K. pneumoniae-mgrB</i> IS1R between +44 and +45 (2)                  | 1                 | 128      |
| <i>K. pneumoniae-mgrB</i> ISKpn26-like between +74 and +75 (2)          | 1                 | 128->128 |
| <i>K. pneumoniae-crrB</i> P151L substitution (1)                        | 128               | >128     |
| <i>K. pneumoniae-crrB</i> G183V substitution (1)                        | 64                | >128     |
| <i>K. pneumoniae-crrB</i> F84S substitution (1)                         | 8                 | 128      |
| <i>K. pneumoniae-crrB</i> N141Y substitution (1)                        | 16                | >128     |
| <i>K. pneumoniae-mcr-1</i> (1)                                          | 0.5               | 32       |
| <i>K. pneumoniae-Unknown</i> (1)                                        | 0.5               | 32       |

**Table 4.** Bacterial susceptibility profile of NOSO-502 against colistin-resistant strains. NOS: NOSO-502, CST: colistin.
